# Supplementary material for: Acute effects of air pollution on ischaemic stroke onset and deaths: a time-series study in Changzhou, China
Source: PubMed Central journal article supplement — BMJ Open. 2018 Jul 23;8(7):e020425. doi: 10.1136/bmjopen-2017-020425 (PMC6059268; doi:10.1136/bmjopen-2017-020425), 2018-07-23
Supplement: bmjopen-2017-020425.draft_revisions.pdf [file bmjopen-2017-020425.draft_revisions.pdf]

# BMJ Open

BMJ Open is committed to open peer review. As part of this commitment we make the peer review history of every article we publish publicly available.

When an article is published we post the peer reviewers' comments and the authors' responses online. We also post the versions of the paper that were used during peer review. These are the versions that the peer review comments apply to.

The versions of the paper that follow are the versions that were submitted during the peer review process. They are not the versions of record or the final published versions. They should not be cited or distributed as the published version of this manuscript.

BMJ Open is an open access journal and the full, final, typeset and author-corrected version of record of the manuscript is available on our site with no access controls, subscription charges or pay-per-view fees (<http://bmjopen.bmj.com>).

If you have any questions on BMJ Open's open peer review process please email [info.bmjopen@bmj.com](mailto:info.bmjopen@bmj.com)

# BMJ Open

## Acute effects of air pollution on ischemic stroke onsets and deaths: A time-series study in Changzhou, China

|                                 |                                                                                                                                                                                                                                                                                                                                                                                                                                                                                                                                                                              |
|---------------------------------|------------------------------------------------------------------------------------------------------------------------------------------------------------------------------------------------------------------------------------------------------------------------------------------------------------------------------------------------------------------------------------------------------------------------------------------------------------------------------------------------------------------------------------------------------------------------------|
| Journal:                        | <i>BMJ Open</i>                                                                                                                                                                                                                                                                                                                                                                                                                                                                                                                                                              |
| Manuscript ID                   | bmjopen-2017-020425                                                                                                                                                                                                                                                                                                                                                                                                                                                                                                                                                          |
| Article Type:                   | Research                                                                                                                                                                                                                                                                                                                                                                                                                                                                                                                                                                     |
| Date Submitted by the Author:   | 03-Nov-2017                                                                                                                                                                                                                                                                                                                                                                                                                                                                                                                                                                  |
| Complete List of Authors:       | Dong, Huibin; Changzhou Center for Disease Control and Prevention<br>Yu, Yongquan; Nanjing Medical University<br>Yao, Shen; Nanjing Medical University<br>Lu, Yan; The First Affiliated Hospital of Nanjing Medical University<br>Chen, Zhiyong; Changzhou Center for Disease Control and Prevention<br>Li, Guiying; Changzhou Center for Disease Control and Prevention<br>Yao, Yao; Changzhou Center for Disease Control and Prevention<br>Yao, Xingjuan ; Changzhou Center for Disease Control and Prevention<br>Wang, Shoulin; Nanjing Medical University<br>Zhang, Zhan |
| <b>Primary Subject Heading</b>: | Epidemiology                                                                                                                                                                                                                                                                                                                                                                                                                                                                                                                                                                 |
| Secondary Subject Heading:      | Occupational and environmental medicine, Cardiovascular medicine                                                                                                                                                                                                                                                                                                                                                                                                                                                                                                             |
| Keywords:                       | Cardiac Epidemiology < CARDIOLOGY, Ischaemic heart disease < CARDIOLOGY, PUBLIC HEALTH                                                                                                                                                                                                                                                                                                                                                                                                                                                                                       |
|                                 |                                                                                                                                                                                                                                                                                                                                                                                                                                                                                                                                                                              |

SCHOLARONE™  
Manuscripts

1  
2  
3  
4 **Acute effects of air pollution on ischemic stroke onsets and deaths: A time-series**  
5  
6 **study in Changzhou, China**  
7  
8  
9

10 Huibin Dong<sup>1, a</sup>, Yongquan Yu<sup>2, a</sup>, Shen Yao<sup>2</sup>, Yan Lu<sup>3</sup>, Zhiyong Chen<sup>1</sup>, Guiying Li<sup>1</sup>,  
11  
12 Yao Yao<sup>1</sup>, Xingjuan Yao<sup>1</sup>, Shou-Lin Wang<sup>2</sup>, Zhan Zhang<sup>4\*</sup>  
13  
14

15  
16 <sup>1</sup>Department of Chronic Disease Control and Prevention, Changzhou Center for  
17  
18 Disease Control and Prevention, 203 Taishan Road, Changzhou, Jiangsu, 213022, PR  
19  
20 China.  
21

22  
23 <sup>2</sup>Department of Occupational Medicine and Environmental Health, School of Public  
24  
25 Health, Nanjing Medical University, 101 Longmian Avenue, Nanjing, Jiangsu,  
26  
27 211166, P. R. China.  
28

29  
30 <sup>3</sup>Department of Cardiology, The First Affiliated Hospital of Nanjing Medical  
31  
32 University, 300 Guangzhou Road, Nanjing 210029, People's Republic of China.  
33  
34

35  
36 <sup>4</sup>Department of Hygiene Analysis and Detection, School of Public Health, Nanjing  
37  
38 Medical University, 101 Longmian Avenue, Nanjing, Jiangsu, 211166, P. R. China.  
39

40 <sup>a</sup> These authors contributed equally to this work.  
41  
42  
43

44 **\*Correspondence to:**

45  
46 Zhan Zhang, Department of Hygiene Analysis and Detection, School of Public Health,  
47  
48 Nanjing Medical University, 101 Longmian Avenue, Nanjing, Jiangsu, 211166, P. R.  
49  
50 China.  
51

52  
53  
54 Tel: +86-25-8686-8402  
55  
56

1  
2  
3 Fax: +86-25-8686-8499  
4  
5

6 E-mail: [zhanzhang@njmu.edu.cn](mailto:zhanzhang@njmu.edu.cn)  
7  
8  
9  
10  
11  
12  
13  
14  
15  
16  
17  
18  
19  
20  
21  
22  
23  
24  
25  
26  
27  
28  
29  
30  
31  
32  
33  
34  
35  
36  
37  
38  
39  
40  
41  
42  
43  
44  
45  
46  
47  
48  
49  
50  
51  
52  
53  
54  
55  
56  
57  
58  
59  
60

For peer review only

## ABSTRACT

**Objective** To investigate the acute effect of air pollutants on ischemic stroke (IS) and IS related death.

**Setting** 5 urban districts in Changzhou, China between January 9, 2015 and December 31, 2016.

**Participants** 32,840 IS cases and 4,028 IS deaths were enrolled.

**Main outcome measures** Time- series design, generalized additive model and multivariable regression model were used to examine the percentage change (95% confidence interval [CI]) in daily IS counts and deaths with an interquartile range (IQR) increase in air pollutants levels for different single or multiple lag days in single-pollutant and two-pollutants models.

**Results** Daily IS counts increased 0.208% (95% [CI]: 0.036%-0.381%) with an IQR increment in levels of NO<sub>2</sub>. The estimated risk of NO<sub>2</sub> was more robust in males and cold season. For daily IS counts, the estimated effects of NO<sub>2</sub> and SO<sub>2</sub> were more significant when adjusted for PM<sub>2.5</sub> and PM<sub>10</sub>. An IQR increment in the concentration of PM<sub>10</sub>, SO<sub>2</sub> and NO<sub>2</sub> significantly increased IS deaths with 6 days cumulative effects (0.268%, 95% CI: 0.007%-1.528%; 0.34%, 0.088%-0.592%; 0.263%, 0.004%-0.522%, respectively). Young individuals (< 65) had higher IS mortality risk for PM<sub>2.5</sub>, PM<sub>10</sub>, NO<sub>2</sub> and CO. For IS death, the effects estimates of SO<sub>2</sub> in the elderly, female and cold season were more pronounced, statistical significance was also identified for SO<sub>2</sub> when adjusted for CO.

1  
2  
3 **Conclusions** This study suggested that short term exposure to ambient NO<sub>2</sub> was  
4  
5 associated with increased IS risk. And SO<sub>2</sub> were associated with increased IS onsets  
6  
7 and deaths.  
8  
9

## 10 11 **Article Summary**

### 12 13 **Strengths and limitations of this study**

- 14  
15  
16  
17  
18  
19  
20  
21  
22  
23  
24  
25  
26  
27  
28  
29  
30  
31  
32  
33  
34  
35  
36  
37  
38  
39  
40  
41  
42  
43  
44  
45  
46  
47  
48  
49  
50  
51  
52  
53  
54  
55  
56  
57  
58  
59  
60  
▪ This is the first comprehensive research in China that exploring the short-term effects of air pollutants on the morbidity and mortality of stroke at the same time.
- The statistical power to detect the association was sufficient because of the tremendous numbers of IS cases and IS deaths recorded in our work.
- This time-series study evaluated the association of modifiers between air pollution and daily IS counts or deaths, which may provide clues for the primary prevention of IS and IS related death.
- We could not precisely quantify the air pollutants exposure of individuals using the fixed-site monitoring data.
- This is a single city-based study and the results should be extrapolated with caution.

## INTRODUCTION

Air pollution is considered as a primary risk factor for a mounting body of pollution-related diseases and deaths [1]. Moreover, as a modifiable risk factor, air pollution accounts for more than 7 million deaths annually [2]. Studies have extensively explored the association between air pollution and risk of respiratory, reproductive and cardiovascular diseases [3-5]. Epidemiological studies suggested that exposure to air pollutants may increase the risk of cardiovascular diseases in haze days [6-8]. For instance, a study conducted in Stockholm suggested that short-term exposure to PM<sub>2.5</sub> was associated with out of hospital cardiac arrest. Increments in particulate matters with aerodynamic diameters < 2.5 µm (PM<sub>2.5</sub>), < 10 µm (PM<sub>10</sub>), nitrogen dioxide (NO<sub>2</sub>), sulfur dioxide (SO<sub>2</sub>) and carbon monoxide (CO) were associated with higher risk of heart failure hospitalization and death. A meta-analysis indicated that long-term exposure to PM<sub>2.5</sub> was related to a dramatic increase in cardiovascular mortality [9].

Stroke is a persistent neurological deficit caused by cerebrovascular damages. It can be classified into ischemic stroke (IS) and hemorrhagic stroke (HS) on the basis of pathophysiologic mechanisms [10-12]. Stroke is one of the most leading causes of death and disability-adjusted life years worldwide [13, 14]. In 2010, the estimated number of individuals suffered from stroke was 50 million and among them, approximately 17 million cases were newly identified that year. China bears enormous stroke burden in the world with the highest stroke prevalence, incidence and mortality among other developing world [15]. As the major subtype of stroke in China, IS

1  
2  
3 accounts for 43% to 79% of all strokes and provokes growing concerns recently [16].

4  
5  
6 Given the tremendous disease burden of stroke, risk factors identification and  
7  
8 prevention are critical and effective public health strategies [17]. However, in terms of  
9  
10 stroke, the effect of air pollutants remains a matter of debate, which might be, at least  
11  
12 in part, explained by the heterogeneity in different stroke subtypes [18, 19]. Thus, it is  
13  
14 a pressing need to synthetically explore the association between air pollutants and  
15  
16 specific subtype of stroke related incidence and mortality.  
17  
18

19  
20 Changzhou stands on the southern bank of the Yangtze River. The city serves as  
21  
22 part of the Suzhou-Wuxi-Changzhou metropolitan area and by the year of 2010, there  
23  
24 were about 4 million residents in five urban districts (Tianning district, Wujin district,  
25  
26 Jintan district, Xinbei district and Liyang city) [20]. Moreover, with the rapid  
27  
28 industrialization and economic development in the past years, Changzhou is now  
29  
30 experiencing severe air pollution. The concentrations of several air pollutants (such as  
31  
32 PM<sub>2.5</sub>, PM<sub>10</sub>, SO<sub>2</sub> and NO<sub>2</sub>) were equal or higher than the national ambient air quality  
33  
34 in the recent years [21, 22]. Therefore, Changzhou was chosen as a suitable place to  
35  
36 study the effect of air pollution on incidence and mortality of IS. In this study, a  
37  
38 comprehensive time-series study was conducted in Changzhou to examine the  
39  
40 association between main air pollutants and daily IS counts and deaths. To explore the  
41  
42 effect modification, the association of modifiers between air pollution and daily IS  
43  
44 counts and deaths was also evaluated. This work will help provide insights into the  
45  
46 relationship between stroke and air pollutants and have implication for prevention of  
47  
48 IS and IS related deaths.  
49  
50  
51  
52  
53  
54  
55  
56



## MATERIALS AND METHODS

### Data collection

Air pollution data, including daily 24-hour average levels of PM<sub>2.5</sub>, PM<sub>10</sub>, NO<sub>2</sub>, SO<sub>2</sub> and CO between January 9, 2015 and December 31, 2016 were obtained from ten air quality monitoring stations run by Changzhou Environmental Monitoring Center. The daily mean levels for air pollutants were averaged from all the stations and approximately all the cases recorded in this study resided less than 40 km from the nearest monitoring station. Thus, the monitoring data could be used as an appropriate proxy for personal exposure. Daily meteorological data on temperature (°C) and relative humidity (%) were collected from Changzhou Meteorological Bureau.

Daily IS and IS mortality data from January 9, 2015 to December 31, 2016 were obtained from the database of Changzhou Center for Disease Control and Prevention (CDC). This database belonged to the government -controlled network reporting system for chronic diseases, which was established in Changzhou, 2012.

Cardiovascular physicians were responsible for the diagnosis of IS according to the cerebrovascular ICD-10 codes for IS (I63). Demographic data were collected from Changzhou Municipal Bureau of Statistics. Daily IS counts and deaths were also stratified into groups by gender (male and female) and age group (<65 and ≥65 year-old) to explore the effect modification of individual characteristics.

### Statistical analysis

Daily IS counts, daily IS death counts, air pollutants levels and weather data were linked by date for the subsequent time-series study, which was applied to analyze the

1  
2  
3 effects of each air pollutant on IS counts and death. After evaluating the distribution  
4 patterns of daily IS counts and deaths, Poisson distributions were identified. Poisson  
5 regression was used in generalized additive model (GAM) to calculate the data.  
6  
7  
8  
9  
10 Multivariable regression model was used to detect the air pollutants related  
11 associations and control the potential confounding factors, such as calendar time, day  
12 of week (DOW), daily average relative humidity and temperature. The five degree of  
13 freedom (df) was used to adjust for all the confounding factors mentioned above  
14 except for DOW (df= 7). Furthermore, to explore the potential modification, data  
15 were stratified by sex, age (<65 as young individuals and  $\geq 65$  as the elderly) and  
16 season (warm season as 1 May to 31 October and cold season as 1 November to 30  
17 April). Associations between air pollutants and IS and IS related death were  
18 separately examined according to the following equation:  
19  
20  
21  
22  
23  
24  
25  
26  
27  
28  
29  
30  
31

$$\text{Log}[E(T/D_n)] = \text{intercept} + \beta_1 \text{AirPollution}_{n-i} + \beta_2 \text{DOW} + \text{ps}(\text{calendar time, df= 7}) + \text{ps}(\text{Temp}_{n-i}, \text{df= 5}) + \text{ps}(\text{Relative Humidity}_{n-i}, \text{df= 5})$$

32  
33  
34  
35  $E(T/D_n)$  represents the estimated numbers of IS onsets or deaths on day n;

36  
37  
38  $\text{AirPollution}_{n-i}$  represented the average levels of different air pollutants on day n and i  
39 is the day lag;  $\beta$  was vector of the coefficients; DOW was the day of week; ps ()  
40 presented penalized spline function;  $\text{Temp}_{n-i}$  and  $\text{Relative Humidity}_{n-i}$  represented  
41 average temperature and relative humidity on day n and i is the day lag.  
42  
43  
44  
45  
46  
47

48 In addition, for both daily IS counts and deaths, single-pollutant models were  
49 fitted with different single lag days (lag0, lag1, lag3 and lag5) to detect the effects of  
50 air pollution on IS. As underestimation may occur in single-day models, multiple-day  
51 lag models (lag0-1, lag0-3 and lag0-5) were also applied in this study. Smoothing  
52  
53  
54  
55  
56  
57

function was used in the analysis of the exposure-response relationship between the log-relative risk of daily IS counts or deaths and air pollutants concentrations using a 5 df in single-pollutant model.

Statistical software R (version 3.2.3, R Foundation for Statistical Computing, Austria) was used for data analysis and result output. The baseline data was presented as mean  $\pm$  standard deviation (SD) for continuous variables. All tests were two-sided, and  $P < 0.05$  was considered as statistically significant.

## RESULTS

### Descriptive Analysis

During this study period, there were 32,840 IS cases and 4,028 IS deaths recorded, respectively. For IS, on average, 45.4 cases were identified each day (Table S1). Of these, 52.2% were males and 81.3% were the elderly ( $\geq 65$ ). And for IS related death, there were 5.6 deaths recorded on average each day (Table S1). Of these, 48.2% were males and 96.4% were the elderly.

Daily average meteorological data were 17.0°C for temperature and 75% for relative humidity. The daily average levels were 51.8  $\mu\text{g}/\text{m}^3$  for PM<sub>2.5</sub>, 85.3  $\mu\text{g}/\text{m}^3$  for PM<sub>10</sub>, 22.3  $\mu\text{g}/\text{m}^3$  for SO<sub>2</sub>, 38.7  $\mu\text{g}/\text{m}^3$  for NO<sub>2</sub> and 1 mg/ m<sup>3</sup> for CO (Table 2).

According to the WHO air quality guidelines (25  $\mu\text{g}/\text{m}^3$  for PM<sub>2.5</sub>, 50  $\mu\text{g}/\text{m}^3$  for PM<sub>10</sub> and 20  $\mu\text{g}/\text{m}^3$  for SO<sub>2</sub>), the corresponding average levels of PM<sub>2.5</sub>, PM<sub>10</sub> and SO<sub>2</sub> in Changzhou were far beyond the WHO standard.

### Estimated Effects of Air Pollutants

Fig. 1 summarizes the percentage change (95% CI) in daily IS counts and deaths with

1  
2  
3 an interquartile range (IQR) increase in air pollutants levels for different single or  
4  
5 multiple lag days in single-pollutant models. For daily IS counts, statistically positive  
6  
7 association was observed only in IQR increment of NO<sub>2</sub> levels and this association  
8  
9 was the more significant at multi-day exposure than single day exposure. A highest  
10  
11 association was observed for lag 0-5 (0.208%, 0.036%-0.381%) and was used in the  
12  
13 subsequent study. For daily IS deaths, statistically positive associations were observed  
14  
15 in different IQRs increments of PM<sub>10</sub>, SO<sub>2</sub> and NO<sub>2</sub>. All the associations were the  
16  
17 most significant at lag5 (0.268%, 0.007%-0.528% for PM<sub>10</sub>; 0.34%, 0.088%-0.592%  
18  
19 for SO<sub>2</sub>; 0.263%, 0.004%-0.522% for NO<sub>2</sub>) than other days and was thus used in the  
20  
21 subsequent analysis.  
22  
23  
24  
25  
26

27  
28 Concentration-response relationships of air pollutants with daily IS counts or  
29  
30 deaths were conducted in Fig. 2. For IS counts, the curve of NO<sub>2</sub> was linear positive  
31  
32 and flat at higher concentrations. For daily IS deaths, the concentration-response  
33  
34 curves of PM<sub>10</sub> and SO<sub>2</sub> were similar, flat at low levels and dramatically linear  
35  
36 positive at high levels, whereas the curve for NO<sub>2</sub> suggest a linear rise in daily IS  
37  
38 deaths.  
39  
40  
41

42  
43 The effect of NO<sub>2</sub> on the increase of daily IS counts was more significant among  
44  
45 males than that of females and the effects of NO<sub>2</sub> and SO<sub>2</sub> on daily IS counts were  
46  
47 significant in the cold season, but not in the warm season. No significant association  
48  
49 was observed when modifying by age (Table 3). As for daily IS deaths, the estimated  
50  
51 effect of PM<sub>10</sub> was more pronounced among males, whereas the effects of NO<sub>2</sub> and  
52  
53 SO<sub>2</sub> were more robust among females. Moreover, PM<sub>2.5</sub>, PM<sub>10</sub>, NO<sub>2</sub> and CO were  
54  
55  
56

1  
2  
3 found to have greater deleterious effects among young individuals and SO<sub>2</sub> showed  
4  
5 more risk in the elderly. And when modifying by seasons, statistical significance was  
6  
7 identified only for SO<sub>2</sub> in the cold season (Table 3).  
8  
9

10  
11 Table 4 shows the percent increases in daily IS counts and daily IS deaths with  
12  
13 each IQR increment in air pollutants levels in two-pollutants models. For daily IS  
14  
15 counts, the estimated effects of NO<sub>2</sub> and SO<sub>2</sub> were more significant when adjusted for  
16  
17 PM<sub>2.5</sub> and PM<sub>10</sub>. For daily IS deaths, statistical significance was identified for SO<sub>2</sub>  
18  
19 when adjusted for CO.  
20  
21  
22  
23

## 24 **DISCUSSION**

25  
26 In this population-based time-series study, a total of 32,840 IS cases and 4,028 IS  
27  
28 death were identified in Changzhou from 2015 to 2016. Significant association of  
29  
30 NO<sub>2</sub> with daily IS counts was observed even when adjusted by PM<sub>2.5</sub> and PM<sub>10</sub>. The  
31  
32 estimated IS risk of NO<sub>2</sub> was more robust in the elderly and the cold season. In  
33  
34 addition, PM<sub>10</sub>, SO<sub>2</sub> and NO<sub>2</sub> were positively associated with daily IS deaths. The  
35  
36 young individuals had higher IS mortality risk for PM<sub>2.5</sub>, PM<sub>10</sub>, NO<sub>2</sub> and CO. And IS  
37  
38 mortality risk of SO<sub>2</sub> was more robust in the elderly, female and cold season,  
39  
40 statistical significance was also identified for SO<sub>2</sub> when adjusted for CO. To the best  
41  
42 of our knowledge, in China, this is the first comprehensive study to explore the acute  
43  
44 effect of air pollutants on the morbidity and mortality of stroke at the same time.  
45  
46  
47  
48  
49

50  
51 PM<sub>10</sub> could cause endothelial dysfunction, inflammatory response and  
52  
53 neuro-functional impairment and subsequently induce ischemia-like injuries in the  
54  
55 brain [23]. In the current study, an IQR increment in PM<sub>10</sub> concentrations was  
56  
57  
58  
59  
60

1  
2  
3 associated with 0.268% increment in daily IS deaths, which was in consistent with the  
4  
5 previous investigations [24, 25]. Moreover, the function curve for PM<sub>10</sub>/ daily IS  
6  
7 deaths was flat at <150 µg/m<sup>3</sup> and became dramatically sharp at high levels. Previous  
8  
9 multicity time-series study indicated an acute, deleterious and significant effect of  
10  
11 PM<sub>10</sub> on IS mortality and the estimated rate ratios were 1.016 [26]. Long-term  
12  
13 exposure to PM<sub>10</sub> was also demonstrated to positively associate with IS relate death  
14  
15 and the estimated relative risk was 1.37 [27]. Moreover, in this study, greater  
16  
17 estimated IS mortality risk was observed among males and young individuals. It is  
18  
19 plausible that males and young individuals spent more time outdoors and exposed to  
20  
21 higher levels of PM<sub>10</sub> than females and the elderly [28].  
22  
23  
24  
25  
26  
27

28 NO<sub>2</sub>, a representative pollutant of vehicle exhaust, was found to induce  
29  
30 excitotoxicity, endothelial and inflammatory responses and damage synaptic plasticity  
31  
32 in the brain [29],[30, 31]. In China, a multicity case-crossover study demonstrated that  
33  
34 an IQR increase (25.4 µg/m<sup>3</sup>) in NO<sub>2</sub> was corresponded to 2.6% increment in IS  
35  
36 admissions. Stroke mortality was also positively associated with ambient NO<sub>2</sub> levels  
37  
38 [32]. In the present study, we indicated that IQR increments in NO<sub>2</sub> (12 µg/m<sup>3</sup>) was  
39  
40 associated with 0.208% and 0.263% increases in daily IS counts and IS deaths,  
41  
42 respectively. An approximately linear concentration-response relationship was  
43  
44 identified for NO<sub>2</sub> and daily IS counts or daily IS deaths, which was consistent with  
45  
46 the previous report [33, 34]. The positive association for NO<sub>2</sub> and daily IS counts  
47  
48 could be observed even below the National Ambient Air Quality Standards of China  
49  
50 (80 µg/m<sup>3</sup>). For daily IS counts, the effects of NO<sub>2</sub> were statistically positive and  
51  
52  
53  
54  
55  
56  
57  
58  
59  
60

1  
2  
3 stronger when adjusted for other pollutants except for SO<sub>2</sub> (no statistical but stronger  
4 association was observed), suggesting that the adverse effect of NO<sub>2</sub> on IS onsets was  
5 stable an NO<sub>2</sub> contributed most to the increased risk of IS. Moreover, the effects of  
6 NO<sub>2</sub> were more significant in cold season and males. For IS deaths, young females  
7 were found to be experienced higher risk. The underlying reasons may be that the  
8 exposed levels of NO<sub>2</sub> were much higher at these conditions, which was similar to  
9 that of PM<sub>10</sub>. The risk factors for stroke, such as hypertension, atrial fibrillation and  
10 diabetes mellitus are more frequent and the estimated effects are stronger among  
11 females [35]. Females are considered to be more sensitive to stroke onsets and deaths.  
12 Thus, our findings regarding the higher risk of IS deaths observed among females  
13 were reasonable.  
14  
15  
16  
17  
18  
19  
20  
21  
22  
23  
24  
25  
26  
27  
28  
29

30 SO<sub>2</sub> was considered as a strong irritant ambient gaseous pollutant, and could  
31 elevate the expression of vasoregulatory pathways and proinflammatory enzymes  
32 such as ET-1, iNOS, COX-2, ICAM-1 and TNF- $\alpha$  [36]. And its exposure was  
33 demonstrated to contribute to the development and progression of IS [18]. In the  
34 present study, SO<sub>2</sub> was significantly associated with daily IS counts when adjusted by  
35 PM<sub>2.5</sub> or PM<sub>10</sub>. In addition, exposure to SO<sub>2</sub> also had statistical associations with daily  
36 IS deaths (the percentage increase was 0.34%), which was in agreement with previous  
37 studies [19, 37]. The function curve for SO<sub>2</sub>/ daily IS deaths was flat at <35  $\mu\text{g}/\text{m}^3$  and  
38 became dramatically sharp at high levels, suggesting that acute and robust increments  
39 of SO<sub>2</sub> might result in exacerbating IS death. Furthermore, the associations were more  
40 pronounced among females, suggesting that females are more susceptible to IS related  
41  
42  
43  
44  
45  
46  
47  
48  
49  
50  
51  
52  
53  
54  
55  
56  
57  
58  
59  
60

1  
2  
3 deaths when exposed to gaseous pollutants (NO<sub>2</sub> and SO<sub>2</sub>). In addition, SO<sub>2</sub> exhibited  
4  
5 higher risk of IS deaths in the elderly [38]. And it can be deduced that the elderly are  
6  
7 more likely to bear preexisting respiratory or cardiovascular burdens and the  
8  
9 vulnerable condition could influence the effect of SO<sub>2</sub> on stroke [39]. We also found  
10  
11 that exposure to SO<sub>2</sub> had more significant effects on both IS onsets and deaths in cold  
12  
13 season than in warm season.  
14  
15  
16

17  
18 In conclusion, our results suggested that short term exposure to ambient NO<sub>2</sub> was  
19  
20 associated with increased IS risk. And SO<sub>2</sub> were associated with increased IS counts  
21  
22 and deaths. These findings may have significant public health implications for  
23  
24 prevention of IS and IS related death. Further studies are recommended to validate our  
25  
26 research.  
27  
28  
29  
30  
31  
32

33 **Contributors** The study was conceived and designed by Huibin Dong, Yan Lu and Zhan  
34  
35 Zhang, and overall study management was by Xingjuan Yao, Shou-Lin Wang and Zhan  
36  
37 Zhang. Zhiyong Chen, Guiying Li and Yao Yao contributed to data collection and  
38  
39 processing. Shen Yao performed the statistical analysis, Huibin Dong, Yao Yao and Yan  
40  
41 Lu helped manuscript preparation and interpret the results. All authors contributed to the  
42  
43 revision of the manuscript and reviewed and approved the final version.  
44  
45  
46

47 **Funding** This work was supported by the Natural Science Foundation of China (81502801), a  
48  
49 project funded by the Priority Academic Program Development of Jiangsu Higher Education  
50  
51 Institutions (2014), a collegiate Natural Science Foundations of Jiangsu province  
52  
53 (16KJB330005), the science and technology support program funded by Changzhou  
54  
55  
56  
57



1  
2  
3 Municipal Science and Technology Bureau (CE20145046) and the Science and Technique  
4  
5  
6 Foundation for Youths by Health and Family Planning Commission of Changzhou  
7  
8 (QN201603).  
9

10 **Disclaimer** The funding sponsors had no role in the design of the study, in the collection,  
11  
12 analysis or interpretation of data, in the writing of the manuscript or in the decision to publish  
13  
14 the research results.  
15  
16

17  
18 **Ethical approval** The present study was approved by the Institutional Review Board of  
19  
20 Changzhou Center for Disease Control and Prevention, and all procedures were in accordance  
21  
22 with prevailing ethical principles.  
23  
24

25 **Competing interests** None.  
26

27  
28 **Patient consent** Not needed.  
29

30 **Provenance and peer review** Not commissioned; externally peer reviewed.  
31

32  
33 **Data sharing statement** No additional data are available.  
34  
35

## 36 37 38 **REFERENCES**

- 39  
40 1 World Health Organization. 7 million premature deaths annually linked to air pollution.  
41  
42 *Air Quality & Climate Change* 2014.  
43  
44 <http://www.who.int/mediacentre/news/releases/2014/air-pollution/en/>.  
45  
46  
47 2 Vijayan VK, Paramesh H, Salvi SS, *et al*. Enhancing indoor air quality -The air filter  
48  
49 advantage. *Lung India* 2015;**32**:473-9.  
50  
51  
52 3 Radwan M, Jurewicz J, Polanska K, *et al*. Exposure to ambient air pollution--does it  
53  
54 affect semen quality and the level of reproductive hormones? *Ann Hum Biol* 2016;**43**:50-6.  
55  
56  
57

- 1  
2  
3  
4 4 Mills NL, Donaldson K, Hadoke PW, *et al.* Adverse cardiovascular effects of air  
5  
6 pollution. *Nat Clin Pract Card* 2009;**6**:36-44.  
7
- 8 5 Bayram H, Dikensoy O. Effects of air pollution on respiratory health. *Int J*  
9  
10 *Mycobacteriol* 2015;**4**:59.  
11
- 12 6 Raza A, Bellander T, Bero-Bedada G, *et al.* Short-term effects of air pollution on  
13  
14 out-of-hospital cardiac arrest in Stockholm. *Eur Heart J* 2014;**35**:861-8.  
15
- 16 7 Shah AS, Langrish JP, Nair H, *et al.* Global association of air pollution and heart failure:  
17  
18 a systematic review and meta-analysis. *Lancet* 2013;**382**:1039-48.  
19
- 20 8 Hoek G, Krishnan RM, Beelen R, *et al.* Long-term air pollution exposure and cardio-  
21  
22 respiratory mortality: a review. *Environmental health* 2013;**12**:43.  
23
- 24 9 Atkinson RW, Kang S, Anderson HR, *et al.* Epidemiological time series studies of PM<sub>2.5</sub>  
25  
26 and daily mortality and hospital admissions: a systematic review and meta-analysis. *Thorax*  
27  
28 2014;**69**:660-5.  
29
- 30 10 World Health Organization. Cerebrovascular Disorders: A Clinical and Research  
31  
32 Classification. 1978. ISBN 10: 9241700432 ISBN 13: 9789241700436.  
33
- 34 11 Guiraud V, Amor MB, Mas JL, *et al.* Triggers of ischemic stroke: a systematic review.  
35  
36 *Stroke* 2010;**41**:2669-77.  
37
- 38 12 Ohira T, Shahar E, Chambless LE, *et al.* Risk factors for ischemic stroke subtypes: the  
39  
40 Atherosclerosis Risk in Communities study. *Stroke* 2006;**37**:2493-8.  
41
- 42 13 Lozano R, Naghavi M, Foreman K, *et al.* Global and regional mortality from 235 causes  
43  
44 of death for 20 age groups in 1990 and 2010: a systematic analysis for the Global Burden of  
45  
46 Disease Study 2010. *Lancet* 2013;**380**:2095-128  
47  
48  
49  
50  
51  
52  
53  
54  
55  
56  
57  
58  
59  
60

- 1  
2  
3  
4 14 Murray CJ, Vos T, Lozano R, *et al.* Disability-adjusted life years (DALYs) for 291  
5  
6 diseases and injuries in 21 regions, 1990-2010: a systematic analysis for the Global Burden of  
7  
8 Disease Study 2010. *Lancet* 2012;**380**:2197-223.  
9
- 10  
11 15 Wang WZ, Jiang B, Sun HX, *et al.* Prevalence, Incidence, and Mortality of Stroke in  
12  
13 China Results from a Nationwide Population-Based Survey of 480 687 Adults. *Circulation*  
14  
15 2017;**135**:759-71.  
16
- 17  
18 16 Liu LP, Wang D, Wong KSL, *et al.* Stroke and Stroke Care in China Huge Burden,  
19  
20 Significant Workload, and a National Priority. *Stroke* 2011;**42**:3651-4.  
21  
22
- 23 17 Straus SE, Majumdar SR, McAlister FA. New evidence for stroke prevention - Scientific  
24  
25 review. *JAMA* 2002;**288**:1388-95.  
26  
27
- 28 18 Chung JW, Bang OY, Ahn K, *et al.* Air Pollution Is Associated With Ischemic Stroke via  
29  
30 Cardiogenic Embolism. *Stroke* 2017;**48**:17-23.  
31  
32
- 33 19 Yang WS, Wang X, Deng Q, *et al.* An evidence-based appraisal of global association  
34  
35 between air pollution and risk of stroke. *Int J Cardiol* 2014;**175**:307-13.  
36  
37
- 38 20 Kerstens SM, de Mes TZD, Lue B. Designing sustainable sanitation in urban planning  
39  
40 proposed for Changzhou, China. *Water Sci Technol* 2009;**60**:3165-72.  
41  
42
- 43 21 Li L, Chen CH, Huang C, *et al.* [Regional air pollution characteristics simulation of O3  
44  
45 and PM10 over Yangtze River Delta region]. *Huan Jing Ke Xue* 2008;**29**:237-45.  
46  
47
- 48 22 Liao Z, Gao M, Sun J, *et al.* The impact of synoptic circulation on air quality and  
49  
50 pollution-related human health in the Yangtze River Delta region. *Sci Total Environ*  
51  
52 2017;**607-608**:838-46.  
53  
54
- 55 23 Guo L, Li B, Miao JJ, *et al.* Seasonal variation in air particulate matter (PM10)  
56  
57

- 1  
2  
3 exposure-induced ischemia-like injuries in the rat brain. *Chem Res Toxicol* 2015;**28**:431-9.  
4  
5  
6 24 Kettunen J, Lanki T, Tiittanen P, *et al.* Associations of fine and ultrafine particulate air  
7  
8 pollution with stroke mortality in an area of low air pollution levels. *Stroke* 2007;**38**:918-22.  
9  
10  
11 25 Wang Y, Eliot MN, Wellenius GA. Short-term changes in ambient particulate matter and  
12  
13 risk of stroke: a systematic review and meta-analysis. *J Am Heart Assoc* 2014;**3**:845-7.  
14  
15  
16 26 Yorifuji T, Kashima S. Associations of particulate matter with stroke mortality: a  
17  
18 multicity study in Japan. *J Occup Environ Med* 2013;**55**:768-71.  
19  
20  
21 27 Hart JE, Puett RC, Rexrode KM, *et al.* Effect Modification of Long - Term Air Pollution  
22  
23 Exposures and the Risk of Incident Cardiovascular Disease in US Women. *J Am Heart Assoc*  
24  
25 2015;**4**:e002301.  
26  
27  
28 28 Qiu H, Yu IT, Wang X, *et al.* Cool and dry weather enhances the effects of air pollution  
29  
30 on emergency IHD hospital admissions. *Int J Cardiol* 2013;**168**:500-5.  
31  
32  
33 29 Zhu N, Li H, Han M, *et al.* Environmental nitrogen dioxide (NO<sub>2</sub>) exposure influences  
34  
35 development and progression of ischemic stroke. *Toxicol lett* 2012;**214**:120-30.  
36  
37  
38 30 Andersen ZJ, Kristiansen LC, Andersen KK, *et al.* Stroke and long-term exposure to  
39  
40 outdoor air pollution from nitrogen dioxide: a cohort study. *Stroke* 2012;**43**:320-5.  
41  
42  
43 31 Dijkema MB, van Strien RT, van der Zee SC, *et al.* Spatial variation in nitrogen dioxide  
44  
45 concentrations and cardiopulmonary hospital admissions. *Environ Res* 2016;**151**:721-27.  
46  
47  
48 32 Liu H, Tian Y, Xu Y, *et al.* Association between ambient air pollution and hospitalization  
49  
50 for ischemic and hemorrhagic stroke in China: A multicity case-crossover study. *Environ*  
51  
52 *Pollut* 2017;**230**:234-41.  
53  
54  
55 33 Chen R, Zhang Y, Yang C, *et al.* Acute effect of ambient air pollution on stroke mortality  
56  
57

1  
2  
3  
4 in the China air pollution and health effects study. *Stroke* 2013;**44**:954-60.

5  
6 34 Qian Y, Zhu M, Cai B, *et al*. Epidemiological evidence on association between ambient  
7  
8 air pollution and stroke mortality. *J Epidemiol Community Health* 2013;**67**:635-40.

9  
10  
11 35 Cordonnier C, Sprigg N, Sandset EC, *et al*. Stroke in women - from evidence to  
12  
13 inequalities. *Neurology* 2017;**13**:521-32.

14  
15  
16 36 Sang N, Yun Y, Li H, *et al*. SO2 inhalation contributes to the development and  
17  
18 progression of ischemic stroke in the brain. *Toxicol Sci* 2010;**114**:226-36.

19  
20  
21 37 Shah AS, Lee KK, McAllister DA, *et al*. Short term exposure to air pollution and stroke:  
22  
23 systematic review and meta-analysis. *Bmj* 2015;**350**:h1295.

24  
25  
26 38 Huang F, Luo Y, Peng T, *et al*. Gaseous Air Pollution and the Risk for Stroke Admissions:  
27  
28 A Case-Crossover Study in Beijing, China. *Int J Environ Res Public Health* 2017;**14**:189.

29  
30  
31 39 Zanobetti A, Schwartz J, Gold D. Are there sensitive subgroups for the effects of airborne  
32  
33 particles? *Environ Health Persp* 2000;**108**:841-5.

### Figure legends

**Figure 1** The percentage change in daily ischemic stroke (IS) counts and daily IS deaths with an interquartile range increase in air pollutants levels on different lag days in single-pollutant models in Changzhou, 2015-2016. The data was expressed as mean with 95% confidence interval.

**Figure 2** The concentration-response relationships of daily ischemic stroke (IS) counts, daily IS deaths with air pollutants on different lag days (lag 0-5 for daily IS counts and lag 5 for daily IS deaths) in single-pollutant models in Changzhou, 2015-2016.

**Table 1** The means, medians and interquartile ranges (IQRs) for daily air pollutants and weather conditions variables in Changzhou, 2015-2016

| Variables                              | Mean± SD  | Min  | 25th | Median | 75th  | Max   | IQR  |
|----------------------------------------|-----------|------|------|--------|-------|-------|------|
| <b>Weather Condition</b>               |           |      |      |        |       |       |      |
| Temperature (°C)                       | 17.1±8.9  | -6.6 | 9.4  | 18.3   | 24.1  | 34.6  | 5.8  |
| Humidity (%)                           | 75.3±14.2 | 35.0 | 66.0 | 76.0   | 86.0  | 100.0 | 10.0 |
| <b>Air Pollutions</b>                  |           |      |      |        |       |       |      |
| PM <sub>2.5</sub> (µg/m <sup>3</sup> ) | 51.8±30.6 | 6.8  | 29.4 | 44.4   | 64.4  | 181.1 | 20.0 |
| PM <sub>10</sub> (µg/m <sup>3</sup> )  | 85.3±43.3 | 10.5 | 51.5 | 76.6   | 108.6 | 289.1 | 32.0 |
| NO <sub>2</sub> (µg/m <sup>3</sup> )   | 38.7±16   | 10.9 | 26.5 | 35.8   | 47.8  | 117.3 | 12.0 |
| SO <sub>2</sub> (µg/m <sup>3</sup> )   | 22.3±10   | 6.9  | 14.7 | 20.2   | 27.0  | 67.8  | 6.9  |
| CO (mg/m <sup>3</sup> )                | 1±0.3     | 0.4  | 0.8  | 1.0    | 1.2   | 2.6   | 0.2  |

PM<sub>2.5</sub>, particulate matter <2.5 mm in diameter; PM<sub>10</sub>, particulate matter <10 mm in diameter; NO<sub>2</sub>, nitrogen dioxide; SO<sub>2</sub>, sulfur dioxide; CO, carbon monoxide.

**Table 2** The percentage change in daily IS counts and deaths with an interquartile range increase in air pollutants levels modifying by age, gender and seasons in Changzhou, 2015-2016

| Variable                | Total                    | Age                      |                          | Sex                      |                          | Seasons                  |                          |
|-------------------------|--------------------------|--------------------------|--------------------------|--------------------------|--------------------------|--------------------------|--------------------------|
|                         |                          | ≤65                      | >65                      | Female                   | Male                     | Warm                     | Cold                     |
| <b>Daily IS counts*</b> |                          |                          |                          |                          |                          |                          |                          |
| PM <sub>2.5</sub>       | -0.063<br>(-0.215-0.088) | -0.246<br>(-0.568-0.076) | -0.042<br>(-0.21-0.127)  | -0.097<br>(-0.311-0.119) | -0.08<br>(-0.289-0.128)  | -0.149<br>(-0.525-0.228) | -0.098<br>(-0.267-0.071) |
| PM <sub>10</sub>        | -0.053<br>(-0.22-0.114)  | -0.219<br>(-0.572-0.136) | -0.004<br>(-0.191-0.184) | -0.086<br>(-0.324-0.153) | -0.047<br>(-0.279-0.185) | -0.057<br>(-0.41-0.297)  | -0.088<br>(-0.282-0.107) |
| NO <sub>2</sub>         | 0.208<br>(0.036-0.381)‡  | 0.258<br>(-0.075-0.592)  | 0.166<br>(-0.025-0.357)  | 0.168<br>(-0.055-0.391)  | 0.238<br>(0.002-0.475)‡  | -0.136<br>(-0.481-0.21)  | 0.382<br>(0.169-0.596)‡  |
| SO <sub>2</sub>         | 0.125<br>(-0.034-0.284)  | -0.044<br>(-0.364-0.277) | 0.113<br>(-0.062-0.289)  | 0.15<br>(-0.068-0.369)   | 0.056<br>(-0.162-0.275)  | -0.309<br>(-0.651-0.033) | 0.298<br>(0.099-0.498)‡  |
| CO                      | -0.078<br>(-0.22-0.064)  | -0.213<br>(-0.511-0.086) | -0.061<br>(-0.222-0.1)   | -0.151<br>(-0.355-0.053) | -0.007<br>(-0.206-0.192) | -0.175<br>(-0.432-0.083) | -0.053<br>(-0.237-0.131) |
| <b>Daily IS deaths†</b> |                          |                          |                          |                          |                          |                          |                          |
| PM <sub>2.5</sub>       | 0.228<br>(-0.005-0.462)  | 1.144<br>(0.329-1.965)‡  | 0.152<br>(-0.091-0.395)  | 0.124<br>(-0.19-0.439)   | 0.29<br>(-0.043-0.625)   | -0.199<br>(-0.77-0.375)  | 0.184<br>(-0.088-0.456)  |
| PM <sub>10</sub>        | 0.268<br>(0.007-0.528)‡  | 1.52<br>(0.656-2.391)‡   | 0.152<br>(-0.12-0.424)   | 0.093<br>(-0.261-0.448)  | 0.404<br>(0.03-0.78)‡    | -0.012<br>(-0.53-0.509)  | 0.247<br>(-0.075-0.57)   |
| NO <sub>2</sub>         | 0.263<br>(0.004-0.522)‡  | 0.894<br>(0.058-1.736)‡  | 0.195<br>(-0.073-0.463)  | 0.37<br>(0.027-0.715)‡   | 0.132<br>(-0.247-0.512)  | 0.275<br>(-0.222-0.775)  | 0.198<br>(-0.13-0.528)   |
| SO <sub>2</sub>         | 0.34<br>(0.088-0.592)‡   | 0.67<br>(-0.175-1.523)   | 0.307<br>(0.045-0.57)‡   | 0.434<br>(0.096-0.772)‡  | 0.215<br>(-0.15-0.58)    | 0.017<br>(-0.493-0.531)  | 0.388<br>(0.081-0.696)‡  |
| CO                      | 0.175<br>(-0.042-0.392)  | 0.9<br>(0.166-1.639)‡    | 0.108<br>(-0.118-0.335)  | 0.189<br>(-0.11-0.49)    | 0.154<br>(-0.162-0.471)  | 0.02<br>(-0.401-0.443)   | 0.169<br>(-0.104-0.443)  |

\*The multivariable regression model fits the pollutants for daily IS counts data at lag 0-5 and

adjusts for calendar time (df=5), DOW (df=7), daily average humidity (df=5) and average

temperature (df=5).

†The multivariable regression model fits the pollutants for daily IS deaths data at lag 5 and adjusts

for calendar time (df=5), DOW (df=7), daily average humidity (df=5) and average temperature

(df=5).



1  
2  
3  
4  
5  
6  
7  
8  
9  
10  
11  
12  
13  
14  
15  
16  
17  
18  
19  
20  
21  
22  
23  
24  
25  
26  
27  
28  
29  
30  
31  
32  
33  
34  
35  
36  
37  
38  
39  
40  
41  
42  
43  
44  
45  
46  
47  
48  
49  
50  
51  
52  
53  
54  
55  
56  
57  
58  
59  
60

‡ Statistically positive association between air pollutants and daily IS counts or deaths

The data was expressed as mean with 95% confidence interval.

For peer review only

**Table 3** The percent increases in daily IS counts and deaths with each interquartile range increment in air pollutants levels in two-pollutants models in Changzhou, 2015-2016

| Variables         | PM <sub>2.5</sub>         | PM <sub>10</sub>          | NO <sub>2</sub>         | SO <sub>2</sub>          | CO                        |
|-------------------|---------------------------|---------------------------|-------------------------|--------------------------|---------------------------|
| Daily IS counts   |                           |                           |                         |                          |                           |
| PM <sub>2.5</sub> | -0.063<br>(-0.215-0.088)  | 0.25<br>(-0.314-0.817)    | 0.497<br>(0.259-0.735)‡ | 0.305<br>(0.083-0.527) ‡ | -0.059<br>(-0.274-0.157)  |
| PM <sub>10</sub>  | -0.423<br>(-0.881-0.038)  | -0.053<br>(-0.22-0.114)   | 0.539<br>(0.29-0.788)‡  | 0.262<br>(0.034-0.491) ‡ | -0.065<br>(-0.293-0.163)  |
| NO <sub>2</sub>   | -0.346<br>(-0.558--0.134) | -0.438<br>(-0.691--0.185) | 0.208<br>(0.036-0.381)‡ | -0.007<br>(-0.267-0.253) | -0.341<br>(-0.556--0.124) |
| SO <sub>2</sub>   | -0.24<br>(-0.46--0.019)   | -0.244<br>(-0.49-0.003)   | 0.22<br>(-0.067-0.507)  | 0.125<br>(-0.034-0.284)  | -0.166<br>(-0.356-0.023)  |
| CO                | -0.089<br>(-0.314-0.137)  | 0.029<br>(-0.223-0.281)   | 0.45<br>(0.215-0.685)‡  | 0.172<br>(-0.016-0.361)  | -0.078<br>(-0.22-0.064)   |
| Daily IS deaths   |                           |                           |                         |                          |                           |
| PM <sub>2.5</sub> | 0.228<br>(-0.005-0.462)   | 0.436<br>(-0.36-1.238)    | 0.22<br>(-0.127-0.567)  | 0.28<br>(-0.071-0.632)   | 0.065<br>(-0.314-0.446)   |
| PM <sub>10</sub>  | 0.211<br>(-0.463-0.89)    | 0.268<br>(0.007-0.528)‡   | 0.218<br>(-0.135-0.573) | 0.295<br>(-0.055-0.646)  | 0.137<br>(-0.23-0.504)    |
| NO <sub>2</sub>   | 0.106<br>(-0.201-0.414)   | 0.149<br>(-0.21-0.509)    | 0.263<br>(0.004-0.522)‡ | 0.351<br>(-0.096-0.8)    | 0.057<br>(-0.269-0.384)   |
| SO <sub>2</sub>   | 0.066<br>(-0.25-0.383)    | 0.126<br>(-0.242-0.496)   | 0.066<br>(-0.387-0.521) | 0.34<br>(0.088-0.592)‡   | 0.035<br>(-0.281-0.351)   |
| CO                | 0.186<br>(-0.199-0.571)   | 0.233<br>(-0.187-0.656)   | 0.23<br>(-0.14-0.601)   | 0.346<br>(0.002-0.691)‡  | 0.175<br>(-0.042-0.392)   |

\*The multivariable regression model fits the pollutants for daily IS counts data at lag 0-5 and

adjusts for the other pollutants, calendar time (df=5), DOW (df=7), daily average humidity (df=5)

and average temperature (df=5).

†The multivariable regression model fits the pollutants for daily IS deaths data at lag 5 and adjusts

for the other pollutants, calendar time (df=5), DOW (df=7), daily average humidity (df=5) and

average temperature (df=5).

1  
2  
3  
4  
5  
6  
7  
8  
9  
10  
11  
12  
13  
14  
15  
16  
17  
18  
19  
20  
21  
22  
23  
24  
25  
26  
27  
28  
29  
30  
31  
32  
33  
34  
35  
36  
37  
38  
39  
40  
41  
42  
43  
44  
45  
46  
47  
48  
49  
50  
51  
52  
53  
54  
55  
56  
57  
58  
59  
60

‡ Statistically positive association between air pollutants and daily IS counts or deaths

The data was expressed as mean with 95% confidence interval.

For peer review only

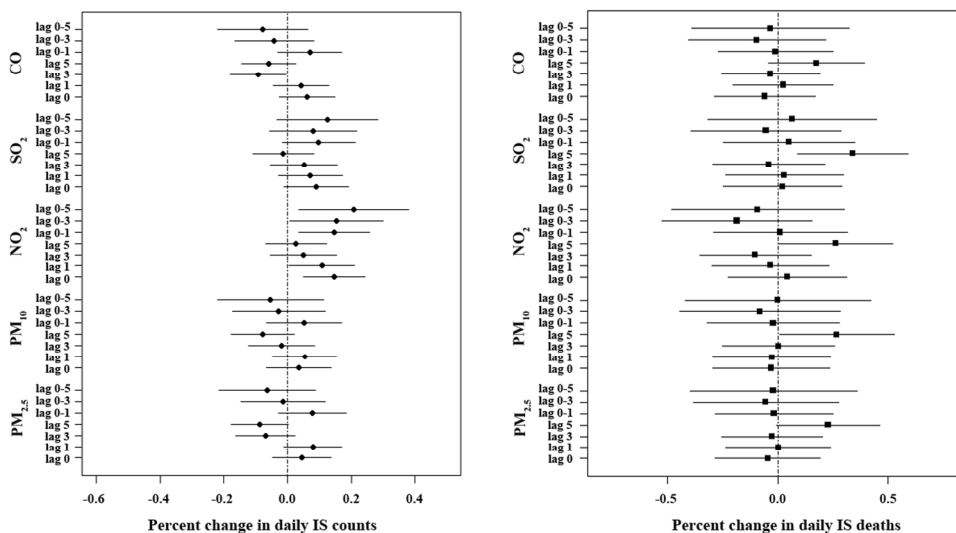

Figure 1 The percentage change in daily ischemic stroke (IS) counts and daily IS deaths with an interquartile range increase in air pollutants levels on different lag days in single-pollutant models in Changzhou, 2015-2016. The data was expressed as mean with 95% confidence interval.

86x48mm (600 x 600 DPI)

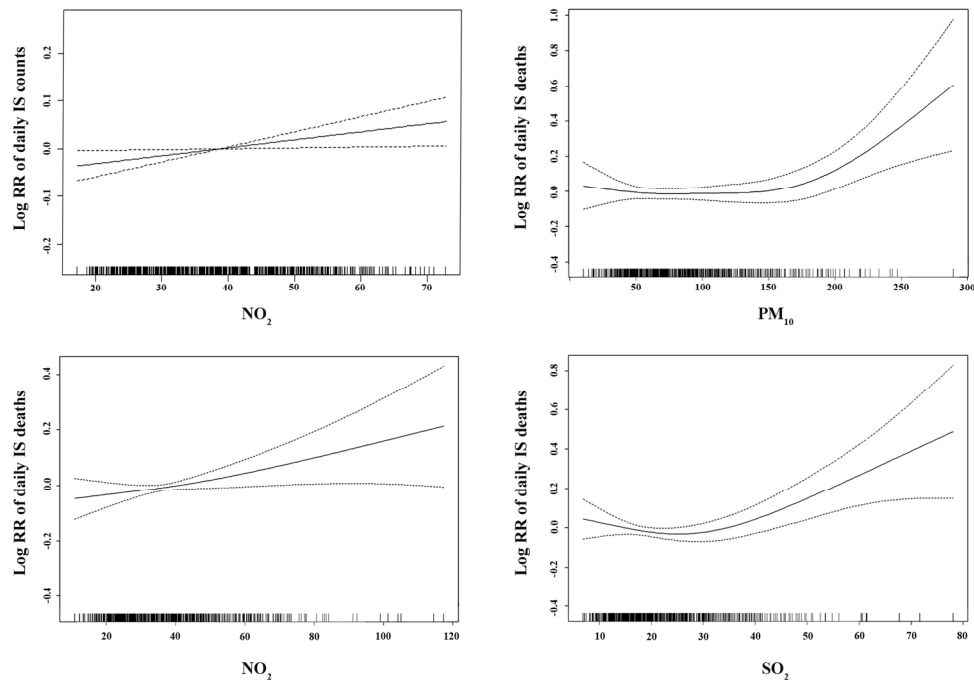

Figure 2 The concentration-response relationships of daily ischemic stroke (IS) counts, daily IS deaths with air pollutants on different lag days (lag 0-5 for daily IS counts and lag 5 for daily IS deaths) in single-pollutant models in Changzhou, 2015-2016.

107x75mm (600 x 600 DPI)

1  
2  
3  
4 **Acute effects of air pollution on ischemic stroke onsets and deaths: A time-series**  
5  
6 **study in Changzhou, China**  
7  
8  
9

10 Hui bin Dong<sup>1, a</sup>, Yongquan Yu<sup>2, a</sup>, Shen Yao<sup>2</sup>, Yan Lu<sup>3</sup>, Zhiyong Chen<sup>1</sup>, Guiying Li<sup>1</sup>,

11  
12  
13 Yao Yao<sup>1</sup>, Xingjuan Yao<sup>1</sup>, Shou-Lin Wang<sup>2</sup>, Zhan Zhang<sup>4\*</sup>  
14  
15

16  
17 **Supplementary data**  
18  
19  
20  
21  
22  
23  
24  
25  
26  
27  
28  
29  
30  
31  
32  
33  
34  
35  
36  
37  
38  
39  
40  
41  
42  
43  
44  
45  
46  
47  
48  
49  
50  
51  
52  
53  
54  
55  
56  
57  
58  
59  
60

**Table S1** The descriptive statistics for daily ischemic stroke (IS) counts and deaths in Changzhou, 2015-2016\*

| Variables       | Mean± SD  | Min  | 25th | Median | 75th | Max  |
|-----------------|-----------|------|------|--------|------|------|
| Daily IS counts | 45.4±11.2 | 14.0 | 38.0 | 45.0   | 53.0 | 99.0 |
| Male            | 23.7±7    | 6.0  | 19.0 | 23.0   | 28.0 | 60.0 |
| Female          | 21.8±6.1  | 6.0  | 18.0 | 22.0   | 26.0 | 48.0 |
| <65             | 8.5±3.6   | 0.0  | 6.0  | 8.0    | 11.0 | 23.0 |
| ≥65             | 36.9±9.2  | 11.0 | 31.0 | 36.0   | 43.0 | 80.0 |
| Daily IS deaths | 5.6±2.9   | 0.0  | 3.0  | 5.0    | 7.0  | 19.0 |
| Male            | 2.7±1.8   | 0.0  | 1.0  | 3.0    | 4.0  | 10.0 |
| Female          | 2.8±2     | 0.0  | 1.0  | 3.0    | 4.0  | 10.0 |
| <65             | 0.4±0.7   | 0.0  | 0.0  | 0.0    | 1.0  | 3.0  |
| ≥65             | 5.1±2.8   | 0.0  | 3.0  | 5.0    | 7.0  | 18.0 |

\*A total of 32,840 IS cases and 4,028 IS deaths recorded were recorded during the study period.

STROBE Statement—Checklist of items that should be included in reports of *cross-sectional studies*

|                              | Item No | Recommendation                                                                                                                                                                                                                                                                                                                                                                                                |
|------------------------------|---------|---------------------------------------------------------------------------------------------------------------------------------------------------------------------------------------------------------------------------------------------------------------------------------------------------------------------------------------------------------------------------------------------------------------|
| <b>Title and abstract</b>    | 1-4     | Acute effects of air pollution on ischemic stroke onsets and deaths: A time-series study in Changzhou, China<br>(b) Provide in the abstract an informative and balanced summary of what was done and what was found                                                                                                                                                                                           |
| <b>Introduction</b>          |         |                                                                                                                                                                                                                                                                                                                                                                                                               |
| Background/rationale         | 5-6     | Explain the scientific background and rationale for the investigation being reported                                                                                                                                                                                                                                                                                                                          |
| Objectives                   | 6       | State specific objectives, including any prespecified hypotheses                                                                                                                                                                                                                                                                                                                                              |
| <b>Methods</b>               |         |                                                                                                                                                                                                                                                                                                                                                                                                               |
| Study design                 | 7-9     | Present key elements of study design early in the paper                                                                                                                                                                                                                                                                                                                                                       |
| Setting                      | 7       | Describe the setting, locations, and relevant dates, including periods of recruitment, exposure, follow-up, and data collection                                                                                                                                                                                                                                                                               |
| Participants                 | 7       | (a) Give the eligibility criteria, and the sources and methods of selection of participants                                                                                                                                                                                                                                                                                                                   |
| Variables                    | 8       | Clearly define all outcomes, exposures, predictors, potential confounders, and effect modifiers. Give diagnostic criteria, if applicable                                                                                                                                                                                                                                                                      |
| Data sources/<br>measurement | 7*      | For each variable of interest, give sources of data and details of methods of assessment (measurement). Describe comparability of assessment methods if there is more than one group                                                                                                                                                                                                                          |
| Bias                         | 7-8     | Describe any efforts to address potential sources of bias                                                                                                                                                                                                                                                                                                                                                     |
| Study size                   | 7       | Explain how the study size was arrived at                                                                                                                                                                                                                                                                                                                                                                     |
| Quantitative variables       | 8       | Explain how quantitative variables were handled in the analyses. If applicable, describe which groupings were chosen and why                                                                                                                                                                                                                                                                                  |
| Statistical methods          | 9       | (a) Describe all statistical methods, including those used to control for confounding<br>(b) Describe any methods used to examine subgroups and interactions<br>(c) Explain how missing data were addressed<br>(d) If applicable, describe analytical methods taking account of sampling strategy<br>(e) Describe any sensitivity analyses                                                                    |
| <b>Results</b>               |         |                                                                                                                                                                                                                                                                                                                                                                                                               |
| Participants                 | 9*      | (a) Report numbers of individuals at each stage of study—eg numbers potentially eligible, examined for eligibility, confirmed eligible, included in the study, completing follow-up, and analysed<br>(b) Give reasons for non-participation at each stage<br>(c) Consider use of a flow diagram                                                                                                               |
| Descriptive data             | 9*      | (a) Give characteristics of study participants (eg demographic, clinical, social) and information on exposures and potential confounders<br>(b) Indicate number of participants with missing data for each variable of interest                                                                                                                                                                               |
| Outcome data                 | 10-11*  | Report numbers of outcome events or summary measures                                                                                                                                                                                                                                                                                                                                                          |
| Main results                 | 10-11   | (a) Give unadjusted estimates and, if applicable, confounder-adjusted estimates and their precision (eg, 95% confidence interval). Make clear which confounders were adjusted for and why they were included<br>(b) Report category boundaries when continuous variables were categorized<br>(c) If relevant, consider translating estimates of relative risk into absolute risk for a meaningful time period |



|                          |       |                                                                                                                                                                            |
|--------------------------|-------|----------------------------------------------------------------------------------------------------------------------------------------------------------------------------|
| Other analyses           | 10-11 | Report other analyses done—eg analyses of subgroups and interactions, and sensitivity analyses                                                                             |
| <b>Discussion</b>        |       |                                                                                                                                                                            |
| Key results              | 11    | Summarise key results with reference to study objectives                                                                                                                   |
| Limitations              | 12-13 | Discuss limitations of the study, taking into account sources of potential bias or imprecision. Discuss both direction and magnitude of any potential bias                 |
| Interpretation           | 12-13 | Give a cautious overall interpretation of results considering objectives, limitations, multiplicity of analyses, results from similar studies, and other relevant evidence |
| Generalisability         | 14    | Discuss the generalisability (external validity) of the study results                                                                                                      |
| <b>Other information</b> |       |                                                                                                                                                                            |
| Funding                  | 14    | Give the source of funding and the role of the funders for the present study and, if applicable, for the original study on which the present article is based              |

\*Give information separately for exposed and unexposed groups.

**Note:** An Explanation and Elaboration article discusses each checklist item and gives methodological background and published examples of transparent reporting. The STROBE checklist is best used in conjunction with this article (freely available on the Web sites of PLoS Medicine at <http://www.plosmedicine.org/>, Annals of Internal Medicine at <http://www.annals.org/>, and Epidemiology at <http://www.epidem.com/>). Information on the STROBE Initiative is available at [www.strobe-statement.org](http://www.strobe-statement.org).

# BMJ Open

## Acute effects of air pollution on ischemic stroke onsets and deaths: A time-series study in Changzhou, China

|                                 |                                                                                                                                                                                                                                                                                                                                                                                                                                                                                                                                                                              |
|---------------------------------|------------------------------------------------------------------------------------------------------------------------------------------------------------------------------------------------------------------------------------------------------------------------------------------------------------------------------------------------------------------------------------------------------------------------------------------------------------------------------------------------------------------------------------------------------------------------------|
| Journal:                        | <i>BMJ Open</i>                                                                                                                                                                                                                                                                                                                                                                                                                                                                                                                                                              |
| Manuscript ID                   | bmjopen-2017-020425.R1                                                                                                                                                                                                                                                                                                                                                                                                                                                                                                                                                       |
| Article Type:                   | Research                                                                                                                                                                                                                                                                                                                                                                                                                                                                                                                                                                     |
| Date Submitted by the Author:   | 08-Mar-2018                                                                                                                                                                                                                                                                                                                                                                                                                                                                                                                                                                  |
| Complete List of Authors:       | Dong, Huibin; Changzhou Center for Disease Control and Prevention<br>Yu, Yongquan; Nanjing Medical University<br>Yao, Shen; Nanjing Medical University<br>Lu, Yan; The First Affiliated Hospital of Nanjing Medical University<br>Chen, Zhiyong; Changzhou Center for Disease Control and Prevention<br>Li, Guiying; Changzhou Center for Disease Control and Prevention<br>Yao, Yao; Changzhou Center for Disease Control and Prevention<br>Yao, Xingjuan ; Changzhou Center for Disease Control and Prevention<br>Wang, Shoulin; Nanjing Medical University<br>Zhang, Zhan |
| <b>Primary Subject Heading</b>: | Epidemiology                                                                                                                                                                                                                                                                                                                                                                                                                                                                                                                                                                 |
| Secondary Subject Heading:      | Occupational and environmental medicine, Cardiovascular medicine                                                                                                                                                                                                                                                                                                                                                                                                                                                                                                             |
| Keywords:                       | Cardiac Epidemiology < CARDIOLOGY, Ischaemic heart disease < CARDIOLOGY, PUBLIC HEALTH                                                                                                                                                                                                                                                                                                                                                                                                                                                                                       |
|                                 |                                                                                                                                                                                                                                                                                                                                                                                                                                                                                                                                                                              |

SCHOLARONE™  
Manuscripts

1  
2  
3  
4 **Acute effects of air pollution on ischemic stroke onsets and deaths: A time-series**  
5  
6 **study in Changzhou, China**  
7  
8  
9

10 Huibin Dong<sup>1, a</sup>, Yongquan Yu<sup>2, a</sup>, Shen Yao<sup>2</sup>, Yan Lu<sup>3</sup>, Zhiyong Chen<sup>1</sup>, Guiying Li<sup>1</sup>,

11  
12  
13 Yao Yao<sup>1</sup>, Xingjuan Yao<sup>1</sup>, Shou-Lin Wang<sup>2</sup>, Zhan Zhang<sup>4\*</sup>  
14

15  
16 <sup>1</sup>Department of Chronic Disease Control and Prevention, Changzhou Center for  
17  
18 Disease Control and Prevention, 203 Taishan Road, Changzhou, Jiangsu, 213022, PR  
19  
20 China.  
21

22  
23 <sup>2</sup>Department of Occupational Medicine and Environmental Health, School of Public  
24  
25 Health, Nanjing Medical University, 101 Longmian Avenue, Nanjing, Jiangsu,  
26  
27 211166, P. R. China.  
28

29  
30 <sup>3</sup>Department of Cardiology, The First Affiliated Hospital of Nanjing Medical  
31  
32 University, 300 Guangzhou Road, Nanjing 210029, People's Republic of China.  
33  
34

35  
36 <sup>4</sup>Department of Hygiene Analysis and Detection, School of Public Health, Nanjing  
37  
38 Medical University, 101 Longmian Avenue, Nanjing, Jiangsu, 211166, P. R. China.  
39

40 <sup>a</sup> These authors contributed equally to this work.  
41  
42  
43

44 **\*Correspondence to:**

45  
46 Zhan Zhang, Department of Hygiene Analysis and Detection, School of Public Health,  
47  
48 Nanjing Medical University, 101 Longmian Avenue, Nanjing, Jiangsu, 211166, P. R.  
49  
50 China.  
51

52  
53  
54 Tel: +86-25-8686-8402  
55  
56

Fax: +86-25-8686-8499

E-mail: [zhanzhang@njmu.edu.cn](mailto:zhanzhang@njmu.edu.cn)

For peer review only

## ABSTRACT

**Objective** To investigate the acute effect of air pollutants on ischemic stroke (IS) and IS related death.

**Setting** 5 urban districts in Changzhou, China between January 9, 2015 and December 31, 2016.

**Participants** 32,840 IS cases and 4,028 IS deaths were enrolled.

**Main outcome measures** Time- series design, generalized additive model and multivariable regression model were used to examine the percentage change (95% confidence interval [CI]) in daily IS counts and deaths with an interquartile range (IQR) increase in air pollutants levels for different single or multiple lag days in single-pollutant and two-pollutants models.

**Results** Daily IS counts increased 0.208% (95% [CI]: 0.036%-0.381%) with an IQR increment in levels of NO<sub>2</sub>. The estimated risk of NO<sub>2</sub> was more robust in males and cold season. For daily IS counts, the estimated effects of NO<sub>2</sub> and SO<sub>2</sub> were more significant when adjusted for PM<sub>2.5</sub> and PM<sub>10</sub>. An IQR increment in the concentration of PM<sub>10</sub>, SO<sub>2</sub> and NO<sub>2</sub> significantly increased IS deaths with 6 days cumulative effects (0.268%, 95% CI: 0.007%-1.528%; 0.34%, 0.088%-0.592%; 0.263%, 0.004%-0.522%, respectively). Young individuals (< 65) had higher IS mortality risk for PM<sub>2.5</sub>, PM<sub>10</sub>, NO<sub>2</sub> and CO. For IS death, the effects estimates of SO<sub>2</sub> in the elderly, female and cold season were more pronounced, statistical significance was also identified for SO<sub>2</sub> when adjusted for CO.

1  
2  
3 **Conclusions** This study suggested that short term exposure to ambient NO<sub>2</sub> was  
4  
5 associated with increased IS risk. And SO<sub>2</sub> were associated with increased IS onsets  
6  
7 and deaths.  
8  
9

## 10 11 12 **Article Summary**

### 13 14 **Strengths and limitations of this study**

- 15  
16  
17 ▪ This is the first comprehensive research in China that exploring the short-term  
18 effects of air pollutants on the morbidity and mortality of stroke at the same time.
- 19  
20  
21 ▪ The statistical power to detect the association was sufficient because of the  
22 tremendous numbers of IS cases and IS deaths recorded in our work.
- 23  
24  
25 ▪ This time-series study evaluated the association of modifiers between air  
26 pollution and daily IS counts or deaths, which may provide clues for the primary  
27 prevention of IS and IS related death.
- 28  
29  
30 ▪ The exposures measurement of this study was at the community level, and we  
31 could not precisely quantify the air pollutants exposure of individuals using the  
32 fixed-site monitoring data, this may lead to exposure measurement error.
- 33  
34  
35 ▪ This is a single city-based study and the results should be extrapolated with  
36 caution.  
37  
38  
39  
40  
41  
42  
43  
44  
45  
46  
47  
48  
49  
50  
51  
52  
53  
54  
55  
56  
57  
58  
59  
60

## INTRODUCTION

Air pollution is considered as a primary risk factor for a mounting body of pollution-related diseases and deaths [1]. Moreover, as a modifiable risk factor, air pollution accounts for more than 7 million deaths annually [2]. Studies have extensively explored the association between air pollution and risk of respiratory, reproductive and cardiovascular diseases [3-5]. Epidemiological studies suggested that exposure to air pollutants may increase the risk of cardiovascular diseases in haze days [6-8]. For instance, a study conducted in Stockholm suggested that short-term exposure to PM<sub>2.5</sub> was associated with out of hospital cardiac arrest. Increments in particulate matters with aerodynamic diameters < 2.5 µm (PM<sub>2.5</sub>), < 10 µm (PM<sub>10</sub>), nitrogen dioxide (NO<sub>2</sub>), sulfur dioxide (SO<sub>2</sub>) and carbon monoxide (CO) were associated with higher risk of heart failure hospitalization and death. A meta- analysis indicated that long-terms exposure to PM<sub>2.5</sub> was related to a dramatic increase in cardiovascular mortality [9].

Stroke is a persistent neurological deficit caused by cerebrovascular damages and includes ischemic stroke (IS) and hemorrhagic stroke (HS) [10-12]. It is one of the most leading causes of death and disability-adjusted life years worldwide [13, 14]. In 2010, the estimated number of individuals suffered from stroke was 50 million and among them, approximately 17million cases were newly identified. China bears enormous stroke burden in the world with the highest stroke prevalence, incidence and mortality among other developing world [15]. As the major subtype of stroke in China, IS accounts for 43% to 79% of all strokes and provokes growing concerns

1  
2  
3 recently [16]. Given the tremendous disease burden of stroke, risk factors  
4  
5 identification and prevention are critical and effective public health strategies [17].  
6  
7  
8 However, the effect of air pollutants remains a matter of debate, which might be, at  
9  
10 least in part, explained by the heterogeneity in different stroke subtypes [18, 19]. Thus,  
11  
12 it is a pressing need to synthetically explore the association between air pollutants and  
13  
14 specific subtype of stroke related incidence and mortality.  
15  
16

17  
18 Changzhou stands on the southern bank of the Yangtze River. The city serves as  
19  
20 part of the Suzhou-Wuxi-Changzhou metropolitan area and by the year of 2010, there  
21  
22 were about 4 million residents in five urban districts (Tianning district, Wujin district,  
23  
24 Jintan district, Xinbei district and Liyang city) [20]. Moreover, with the rapid  
25  
26 industrialization and economic development in the past years, Changzhou is now  
27  
28 experiencing severe air pollution. The concentrations of several air pollutants (such as  
29  
30  $PM_{2.5}$ ,  $PM_{10}$ ,  $SO_2$  and  $NO_2$ ) were equal or higher than the national ambient air quality  
31  
32 in the recent years [21, 22]. Therefore, Changzhou was chosen as a suitable place to  
33  
34 study the effect of air pollution on incidence and mortality of IS. In this study, a  
35  
36 comprehensive time-series study was conducted in Changzhou to examine the  
37  
38 association between main air pollutants and daily IS counts and deaths. To explore the  
39  
40 effect modification, the association of modifiers between air pollution and daily IS  
41  
42 counts and deaths was also evaluated. This work will help provide insights into the  
43  
44 relationship between stroke and air pollutants and have implication for prevention of  
45  
46 IS onset and IS related deaths.  
47  
48  
49  
50  
51  
52  
53  
54  
55  
56  
57  
58  
59  
60



## MATERIALS AND METHODS

### Data collection

Air pollution data, including daily 24-hour average levels of PM<sub>2.5</sub>, PM<sub>10</sub>, NO<sub>2</sub>, SO<sub>2</sub> and CO between January 9, 2015 and December 31, 2016 were obtained from ten air quality monitoring stations run by Changzhou Environmental Monitoring Center. The daily mean levels for air pollutants were averaged from all the stations and approximately all the cases recorded in this study resided less than 40 km from the nearest monitoring station. Thus, the monitoring data could be used as an appropriate proxy for personal exposure [23-25]. Daily meteorological data on temperature (°C) and relative humidity (%) were collected from Changzhou Meteorological Bureau.

Daily IS and IS mortality data from January 9, 2015 to December 31, 2016 were obtained from the database of Changzhou Center for Disease Control and Prevention (CDC). This database belonged to the government- controlled network reporting system for chronic diseases, which was established in Changzhou, 2012.

Cardiovascular physicians were responsible for the diagnosis of IS according to the cerebrovascular ICD-10 codes for IS (I63). Demographic data were collected from Changzhou Municipal Bureau of Statistics. Daily IS counts and deaths were also stratified into groups by gender (male and female) and age group (<65 and ≥65 year-old) to explore the effect modification of individual characteristics.

### Statistical analysis

Daily IS counts, daily IS death counts, air pollutants levels and weather data were linked by date for the subsequent time-series study, which was applied to analyze the

1  
2  
3 effects of each air pollutant on IS counts and death. After evaluating the distribution  
4 patterns of daily IS counts and deaths, Poisson distributions were identified. Poisson  
5 regression was used in generalized additive model (GAM) to calculate the data.  
6  
7  
8  
9  
10 Multivariable regression model was used to detect the air pollutants related  
11 associations and control the potential confounding factors, such as calendar time, day  
12 of week (DOW), daily average relative humidity and temperature. The five degree of  
13 freedom (df) was used to adjust for all the confounding factors mentioned above  
14 except for DOW (df= 7). Furthermore, to explore the potential modification, data  
15 were stratified by sex, age (<65 as young individuals and  $\geq 65$  as the elderly) and  
16 season (warm season as 1 May to 31 October and cold season as 1 November to 30  
17 April). Associations between air pollutants and IS and IS related death were  
18 separately examined according to the following equation:  
19  
20  
21  
22  
23  
24  
25  
26  
27  
28  
29  
30  
31

$$\text{Log}[E(T/D_n)] = \text{intercept} + \beta_1 \text{AirPollution}_{n-i} + \beta_2 \text{DOW} + \text{ps}(\text{calendar time, df= 7}) + \text{ps}(\text{Temp}_{n-i}, \text{df= 5}) + \text{ps}(\text{Relative Humidity}_{n-i}, \text{df= 5})$$

32  
33  
34  
35  $E(T/D_n)$  represents the estimated numbers of IS onsets or deaths on day n;

36  
37  
38  $\text{AirPollution}_{n-i}$  represented the average levels of different air pollutants on day n and i  
39 is the day lag;  $\beta$  was vector of the coefficients; DOW was the day of week; ps ()  
40 presented penalized spline function;  $\text{Temp}_{n-i}$  and  $\text{Relative Humidity}_{n-i}$  represented  
41 average temperature and relative humidity on day n and i is the day lag.  
42  
43  
44  
45  
46  
47

48 In addition, for both daily IS counts and deaths, single-pollutant models were  
49 fitted with different single lag days (lag0, lag1, lag3 and lag5) to detect the effects of  
50 air pollution on IS. As underestimation may occur in single-day models, multiple-day  
51 lag models (lag0-1, lag0-3 and lag0-5) were also applied in this study. Smoothing  
52  
53  
54  
55  
56  
57

1  
2  
3 function was used in the analysis of the exposure-response relationship between the  
4  
5  
6 log-relative risk of daily IS counts or deaths and air pollutants concentrations using a  
7  
8  
9 5 df in single-pollutant model.

10  
11 Statistical software R (version 3.2.3, R Foundation for Statistical Computing,  
12  
13 Austria) was used for data analysis and result output. The baseline data was presented  
14  
15 as mean  $\pm$  standard deviation (SD) for continuous variables. All tests were two-sided,  
16  
17 and  $P < 0.05$  was considered as statistically significant.  
18  
19

### 20 21 **Public and patient involvement**

22  
23 Public and patient involvement (PPI) was central and integral in the present study.  
24  
25 The PPI group consisted of three male and four female representative patients who  
26  
27 were recruited and chaired by HB. D. The members of the existing group were  
28  
29 involved throughout all stages of this research to make contributions. At the outset,  
30  
31 they helped researchers with topics choosing and study designing by providing  
32  
33 constructive suggestions. Furthermore, they took part in the conference presentations  
34  
35 and group discussions to help filter and interpret data collected from database  
36  
37 mentioned above. They also contributed to discussion about the implications of the  
38  
39 results by using their experiences. These findings have been disseminated to all the  
40  
41  
42  
43  
44  
45 PPI members at the end of the study.  
46  
47  
48  
49

## 50 51 **RESULTS**

### 52 53 **Descriptive Analysis**

54  
55 During this study period, there were 32,840 IS cases and 4,028 IS deaths recorded,  
56  
57

1  
2  
3 respectively. For IS, on average, 45.4 cases were identified each day (Table S1). Of  
4  
5 these, 52.2% were males and 81.3% were the elderly ( $\geq 65$ ). And for IS related death,  
6  
7 there were 5.6 deaths recorded on average each day (Table S1). Of these, 48.2% were  
8  
9 males and 96.4% were the elderly.  
10  
11

12  
13 Daily average meteorological data were 17.0°C for temperature and 75% for  
14  
15 relative humidity. The daily average levels were 51.8  $\mu\text{g}/\text{m}^3$  for  $\text{PM}_{2.5}$ , 85.3  $\mu\text{g}/\text{m}^3$  for  
16  
17  $\text{PM}_{10}$ , 22.3  $\mu\text{g}/\text{m}^3$  for  $\text{SO}_2$ , 38.7  $\mu\text{g}/\text{m}^3$  for  $\text{NO}_2$  and 1  $\text{mg}/\text{m}^3$  for CO (Table 1).  
18  
19

20 According to the WHO air quality guidelines (25  $\mu\text{g}/\text{m}^3$  for  $\text{PM}_{2.5}$ , 50  $\mu\text{g}/\text{m}^3$  for  $\text{PM}_{10}$   
21  
22 and 20  $\mu\text{g}/\text{m}^3$  for  $\text{SO}_2$ ), the corresponding average levels of  $\text{PM}_{2.5}$ ,  $\text{PM}_{10}$  and  $\text{SO}_2$  in  
23  
24 Changzhou were far beyond the WHO standard.  
25  
26

### 27 28 **Estimated Effects of Air Pollutants**

29  
30 Fig. 1 summarizes the percentage change (95% CI) in daily IS counts and deaths with  
31  
32 an interquartile range (IQR) increase in air pollutants levels for different single or  
33  
34 multiple lag days in single-pollutant models. For daily IS counts, statistically positive  
35  
36 association was observed only in IQR increment of  $\text{NO}_2$  levels and this association  
37  
38 was the more significant at multi-day exposure than single day exposure. A highest  
39  
40 association was observed for lag 0-5 (0.208%, 0.036%-0.381%) and was used in the  
41  
42 subsequent study. For daily IS deaths, statistically positive associations were observed  
43  
44 in different IQRs increments of  $\text{PM}_{10}$ ,  $\text{SO}_2$  and  $\text{NO}_2$ . All the associations were the  
45  
46 most significant at lag5 (0.268%, 0.007%-0.528% for  $\text{PM}_{10}$ ; 0.34%, 0.088%-0.592%  
47  
48 for  $\text{SO}_2$ ; 0.263%, 0.004%-0.522% for  $\text{NO}_2$ ) than other days and was thus used in the  
49  
50 subsequent analysis.  
51  
52  
53  
54  
55  
56  
57  
58  
59  
60

1  
2  
3  
4 Concentration-response relationships of air pollutants with daily IS counts or  
5  
6 deaths were conducted in Fig. 2. For IS counts, the curve of NO<sub>2</sub> was linear positive  
7  
8 and flat at higher concentrations. For daily IS deaths, the concentration-response  
9  
10 curves of PM<sub>10</sub> and SO<sub>2</sub> were similar, flat at low levels and dramatically linear  
11  
12 positive at high levels, whereas the curve for NO<sub>2</sub> suggest a linear rise in daily IS  
13  
14 deaths.  
15  
16

17  
18 The effect of NO<sub>2</sub> on the increase of daily IS counts was more pronounced  
19  
20 among males than that of females and the effects of NO<sub>2</sub> and SO<sub>2</sub> on daily IS counts  
21  
22 were more serious in the cold season, but not in the warm season. No significant  
23  
24 association was observed when modifying by age (Table 2). As for daily IS deaths, the  
25  
26 estimated effect of PM<sub>10</sub> was more pronounced among males, whereas the effects of  
27  
28 NO<sub>2</sub> and SO<sub>2</sub> were more robust among females. Moreover, PM<sub>2.5</sub>, PM<sub>10</sub>, NO<sub>2</sub> and CO  
29  
30 were found to have greater deleterious effects among young individuals and SO<sub>2</sub>  
31  
32 showed more risk in the elderly. And when modifying by seasons, statistical  
33  
34 significance was identified only for SO<sub>2</sub> in the cold season (Table 2).  
35  
36  
37  
38  
39

40 Table 3 shows the percent increases in daily IS counts and daily IS deaths with  
41  
42 each IQR increment in air pollutants levels in two-pollutants models. For daily IS  
43  
44 counts, the estimated effects of NO<sub>2</sub> and SO<sub>2</sub> were more serious when adjusted for  
45  
46 PM<sub>2.5</sub> and PM<sub>10</sub>. For daily IS deaths, statistical significance was identified for SO<sub>2</sub>  
47  
48 when adjusted for CO.  
49  
50  
51

## 52 53 **DISCUSSION**

54  
55  
56 In this population-based time-series study, a total of 32,840 IS cases and 4,028 IS  
57  
58

1  
2  
3 death were identified in Changzhou from 2015 to 2016. Significant association of  
4  
5 NO<sub>2</sub> with daily IS counts was observed even when adjusted by PM<sub>2.5</sub> and PM<sub>10</sub>. The  
6  
7 estimated IS risk of NO<sub>2</sub> was more robust in the elderly and the cold season. In  
8  
9  
10 addition, PM<sub>10</sub>, SO<sub>2</sub> and NO<sub>2</sub> were positively associated with daily IS deaths. The  
11  
12 young individuals had higher IS mortality risk for PM<sub>2.5</sub>, PM<sub>10</sub>, NO<sub>2</sub> and CO. And IS  
13  
14 mortality risk of SO<sub>2</sub> was more robust in the elderly, female and cold season,  
15  
16 statistical significance was also identified for SO<sub>2</sub> when adjusted for CO. To the best  
17  
18 of our knowledge, in China, this is the first comprehensive study to explore the acute  
19  
20 effect of air pollutants on the morbidity and mortality of stroke at the same time.  
21  
22  
23  
24

25 PM<sub>10</sub> could cause endothelial dysfunction, inflammatory response and  
26  
27 neuro-functional impairment and subsequently induce ischemia-like injuries in the  
28  
29 brain [26]. In the current study, an IQR increment in PM<sub>10</sub> concentrations was  
30  
31 associated with 0.268% increment in daily IS deaths, which was in consistent with the  
32  
33 previous investigations [27, 28]. Moreover, the function curve for PM<sub>10</sub>/ daily IS  
34  
35 deaths was flat at <150 µg/m<sup>3</sup> and became dramatically sharp at high levels. Previous  
36  
37 multicity time-series study indicated an acute, deleterious and significant effect of  
38  
39 PM<sub>10</sub> on IS mortality and the estimated rate ratios were 1.016 [29]. Long-term  
40  
41 exposure to PM<sub>10</sub> was positively associated with IS relate death and the estimated  
42  
43 relative risk was 1.37 [30]. Moreover, in this study, greater estimated IS mortality risk  
44  
45 was observed among males and young individuals. It is plausible that males and  
46  
47 young individuals spent more time outdoors and exposed to higher levels of PM<sub>10</sub>  
48  
49 than females and the elderly [31].  
50  
51  
52  
53  
54  
55  
56  
57  
58  
59  
60

1  
2  
3  
4 NO<sub>2</sub>, a representative pollutant of vehicle exhaust, was found to induce  
5  
6 excitotoxicity, endothelial and inflammatory responses and damage synaptic plasticity  
7  
8 in the brain [32-34]. In China, a multicity case-crossover study demonstrated that an  
9  
10 IQR increase (25.4 µg/m<sup>3</sup>) in NO<sub>2</sub> was corresponded to 2.6% increment in IS  
11  
12 admissions. Stroke mortality was also positively associated with ambient NO<sub>2</sub> levels  
13  
14 [35]. In the present study, we indicated that IQR increments in NO<sub>2</sub> (12 µg/m<sup>3</sup>) was  
15  
16 associated with 0.208% and 0.263% increases in daily IS counts and IS deaths,  
17  
18 respectively. An approximately linear concentration-response relationship was  
19  
20 identified for NO<sub>2</sub> and daily IS counts or daily IS deaths, which was consistent with  
21  
22 the previous studies [36, 37]. The positive association for NO<sub>2</sub> and daily IS counts  
23  
24 could be observed even below the National Ambient Air Quality Standards of China  
25  
26 (80 µg/m<sup>3</sup>). For daily IS counts, the effects of NO<sub>2</sub> were statistically positive and  
27  
28 stronger when adjusted for other pollutants except for SO<sub>2</sub> (no statistical but stronger  
29  
30 association was observed), suggesting that the adverse effect of NO<sub>2</sub> on IS onsets was  
31  
32 stable and NO<sub>2</sub> contributed most to the increased risk of IS. Moreover, the effects of  
33  
34 NO<sub>2</sub> were more serious in cold season and males. For IS deaths, young females were  
35  
36 found to be experienced higher risk. The underlying reasons may be that the exposed  
37  
38 levels of NO<sub>2</sub> were much higher at these conditions, which was similar to that of PM<sub>10</sub>.  
39  
40 The risk factors for stroke, such as hypertension, atrial fibrillation and diabetes  
41  
42 mellitus are more frequent and the estimated effects are stronger among females [38].  
43  
44 Females are considered to be more sensitive to stroke onsets and deaths. Thus, our  
45  
46 findings regarding the higher risk of IS deaths observed among females were  
47  
48  
49  
50  
51  
52  
53  
54  
55  
56  
57  
58  
59  
60

1  
2  
3 reasonable.

4  
5  
6  $\text{SO}_2$  was considered as a strong irritant ambient gaseous pollutant, and could  
7  
8 elevate the expression of vasoregulatory pathways and proinflammatory enzymes  
9  
10 such as ET-1, iNOS, COX-2, ICAM-1 and TNF- $\alpha$  [39]. And its exposure was  
11  
12 demonstrated to contribute to the development and progression of IS [18]. In the  
13  
14 present study,  $\text{SO}_2$  was significantly associated with daily IS counts when adjusted by  
15  
16  $\text{PM}_{2.5}$  or  $\text{PM}_{10}$ . In addition, exposure to  $\text{SO}_2$  also had statistical associations with daily  
17  
18 IS deaths (the percentage increase was 0.34%), which was in agreement with previous  
19  
20 studies [19, 40]. The function curve for  $\text{SO}_2$  and daily IS deaths was flat at  $<35 \mu\text{g}/\text{m}^3$   
21  
22 and became dramatically sharp at high levels, suggesting that acute and robust  
23  
24 increments of  $\text{SO}_2$  might result in exacerbating IS death. Furthermore, the  
25  
26 associations were more pronounced among females, suggesting that females are more  
27  
28 susceptible to IS related deaths when exposed to gaseous pollutants ( $\text{NO}_2$  and  $\text{SO}_2$ ). In  
29  
30 addition,  $\text{SO}_2$  exhibited higher risk of IS deaths in the elderly [41]. And it can be  
31  
32 deduced that the elderly are more likely to bear preexisting respiratory or  
33  
34 cardiovascular burdens and the vulnerable condition could influence the effect of  $\text{SO}_2$   
35  
36 on stroke [42]. We also found that exposure to  $\text{SO}_2$  had more serious effects on both  
37  
38 IS onsets and deaths in cold season than in warm season.  
39  
40  
41  
42  
43  
44  
45  
46

47 In conclusion, our results suggested that short term exposure to ambient  $\text{NO}_2$  was  
48  
49 associated with increased IS risk. And  $\text{SO}_2$  were associated with increased IS counts  
50  
51 and deaths. These findings may have significant public health implications for  
52  
53 prevention of IS and IS related death. Further studies are recommended to validate our  
54  
55  
56  
57  
58  
59  
60



1  
2  
3  
4 research.

5  
6  
7  
8 **Acknowledgements** The authors are grateful to the PPI group chaired by HB. D who support  
9  
10 the wider programme of work of which the qualitative interviews are a part, to patient  
11  
12 representative and to other members of the study advisory group.  
13  
14

15  
16 **Contributors** The study was conceived and designed by HB. D, Y. L and Z. Z, and overall  
17  
18 study management was by XJ. Y, SL. W and Z. Z. ZY. C, GY. L and Y. Y contributed to  
19  
20 data collection and processing. S. Y performed the statistical analysis, HB. D, Y. Y and Y.  
21  
22 L helped manuscript preparation and interpret the results. All authors contributed to the  
23  
24 revision of the manuscript and reviewed and approved the final version.  
25  
26

27  
28 **Funding** This work was supported by the Natural Science Foundation of China (81502801), a  
29  
30 project funded by the Priority Academic Program Development of Jiangsu Higher Education  
31  
32 Institutions (2014), a collegiate Natural Science Foundations of Jiangsu province  
33  
34 (16KJB330005), the science and technology support program funded by Changzhou  
35  
36 Municipal Science and Technology Bureau (CE20145046) and the Science and Technique  
37  
38 Foundation for Youths by Health and Family Planning Commission of Changzhou  
39  
40 (QN201603).  
41  
42  
43

44  
45 **Disclaimer** The funding sponsors had no role in the design of the study, in the collection,  
46  
47 analysis or interpretation of data, in the writing of the manuscript or in the decision to publish  
48  
49 the research results.  
50  
51  
52  
53  
54  
55  
56  
57

**Ethical approval** The present study was approved by the Institutional Review Board of Changzhou Center for Disease Control and Prevention, and all procedures were in accordance with prevailing ethical principles.

**Competing interests** None declared.

**Patient consent** Not needed.

**Provenance and peer review** Not commissioned; externally peer reviewed.

**Data sharing statement** No additional data are available.

## REFERENCES

- 1 World Health Organization. 7 million premature deaths annually linked to air pollution. *Air Quality & Climate Change* 2014. <http://www.who.int/mediacentre/news/releases/2014/air-pollution/en/>.
- 2 Vijayan VK, Paramesh H, Salvi SS, *et al*. Enhancing indoor air quality -The air filter advantage. *Lung India* 2015;**32**:473-9.
- 3 Radwan M, Jurewicz J, Polanska K, *et al*. Exposure to ambient air pollution--does it affect semen quality and the level of reproductive hormones? *Ann Hum Biol* 2016;**43**:50-6.
- 4 Mills NL, Donaldson K, Hadoke PW, *et al*. Adverse cardiovascular effects of air pollution. *Nat Clin Pract Card* 2009;**6**:36-44.
- 5 Bayram H, Dikensoy O. Effects of air pollution on respiratory health. *Int J Mycobacteriol* 2015;**4**:59.
- 6 Raza A, Bellander T, Bero-Bedada G, *et al*. Short-term effects of air pollution on out-of-hospital cardiac arrest in Stockholm. *Eur Heart J* 2014;**35**:861-8.

- 1  
2  
3 7 Shah AS, Langrish JP, Nair H, *et al.* Global association of air pollution and heart failure:  
4 a systematic review and meta-analysis. *Lancet* 2013;**382**:1039-48.  
5  
6  
7  
8 8 Hoek G, Krishnan RM, Beelen R, *et al.* Long-term air pollution exposure and cardio-  
9 respiratory mortality: a review. *Environmental health* 2013;**12**:43.  
10  
11  
12  
13 9 Atkinson RW, Kang S, Anderson HR, *et al.* Epidemiological time series studies of PM<sub>2.5</sub>  
14 and daily mortality and hospital admissions: a systematic review and meta-analysis. *Thorax*  
15 2014;**69**:660-5.  
16  
17  
18  
19  
20 10 World Health Organization. Cerebrovascular Disorders: A Clinical and Research  
21 Classification. 1978. ISBN 10: 9241700432 ISBN 13: 9789241700436.  
22  
23  
24  
25 11 Guiraud V, Amor MB, Mas JL, *et al.* Triggers of ischemic stroke: a systematic review.  
26 *Stroke* 2010;**41**:2669-77.  
27  
28  
29  
30 12 Ohira T, Shahar E, Chambless LE, *et al.* Risk factors for ischemic stroke subtypes: the  
31 Atherosclerosis Risk in Communities study. *Stroke* 2006;**37**:2493-8.  
32  
33  
34  
35 13 Lozano R, Naghavi M, Foreman K, *et al.* Global and regional mortality from 235 causes  
36 of death for 20 age groups in 1990 and 2010: a systematic analysis for the Global Burden of  
37 Disease Study 2010. *Lancet* 2013;**380**:2095-128  
38  
39  
40  
41  
42 14 Murray CJ, Vos T, Lozano R, *et al.* Disability-adjusted life years (DALYs) for 291  
43 diseases and injuries in 21 regions, 1990-2010: a systematic analysis for the Global Burden of  
44 Disease Study 2010. *Lancet* 2012;**380**:2197-223.  
45  
46  
47  
48  
49 15 Wang WZ, Jiang B, Sun HX, *et al.* Prevalence, Incidence, and Mortality of Stroke in  
50 China Results from a Nationwide Population-Based Survey of 480 687 Adults. *Circulation*  
51 2017;**135**:759-71.  
52  
53  
54  
55  
56  
57  
58  
59  
60

- 1  
2  
3  
4 16 Liu LP, Wang D, Wong KSL, *et al.* Stroke and Stroke Care in China Huge Burden,  
5  
6 Significant Workload, and a National Priority. *Stroke* 2011;**42**:3651-4.  
7  
8  
9 17 Straus SE, Majumdar SR, McAlister FA. New evidence for stroke prevention - Scientific  
10  
11 review. *JAMA* 2002;**288**:1388-95.  
12  
13 18 Chung JW, Bang OY, Ahn K, *et al.* Air Pollution Is Associated With Ischemic Stroke via  
14  
15 Cardiogenic Embolism. *Stroke* 2017;**48**:17-23.  
16  
17  
18 19 Yang WS, Wang X, Deng Q, *et al.* An evidence-based appraisal of global association  
19  
20 between air pollution and risk of stroke. *Int J Cardiol* 2014;**175**:307-13.  
21  
22  
23 20 Kerstens SM, de Mes TZD, Lue B. Designing sustainable sanitation in urban planning  
24  
25 proposed for Changzhou, China. *Water Sci Technol* 2009;**60**:3165-72.  
26  
27  
28 21 Li L, Chen CH, Huang C, *et al.* [Regional air pollution characteristics simulation of O3  
29  
30 and PM10 over Yangtze River Delta region]. *Huan Jing Ke Xue* 2008;**29**:237-45.  
31  
32  
33 22 Liao Z, Gao M, Sun J, *et al.* The impact of synoptic circulation on air quality and  
34  
35 pollution-related human health in the Yangtze River Delta region. *Sci Total Environ*  
36  
37 2017;**607-608**:838-46.  
38  
39  
40 23 Dockery DW, Luttmann-Gibson H, Rich DQ, *et al.* Association of air pollution with  
41  
42 increased incidence of ventricular tachyarrhythmias recorded by implanted cardioverter  
43  
44 defibrillators. *Environ Health Perspect* 2005;**113**:670-4.  
45  
46  
47 24 Wellenius GA, Burger MR, Coull BA, *et al.* Ambient air pollution and the risk of acute  
48  
49 ischemic stroke. *Archives of internal medicine* 2012;**172**:229-34.  
50  
51  
52 25 Xie W, Li G, Zhao D, *et al.* Relationship between fine particulate air pollution and  
53  
54 ischaemic heart disease morbidity and mortality. *Heart* 2015;**101**:257-63.  
55  
56  
57  
58  
59  
60

- 1  
2  
3 26 Guo L, Li B, Miao JJ, *et al.* Seasonal variation in air particulate matter (PM10)  
4  
5 exposure-induced ischemia-like injuries in the rat brain. *Chem Res Toxicol* 2015;**28**:431-9.  
6  
7  
8 27 Kettunen J, Lanki T, Tiittanen P, *et al.* Associations of fine and ultrafine particulate air  
9  
10 pollution with stroke mortality in an area of low air pollution levels. *Stroke* 2007;**38**:918-22.  
11  
12  
13 28 Wang Y, Eliot MN, Wellenius GA. Short-term changes in ambient particulate matter and  
14  
15 risk of stroke: a systematic review and meta-analysis. *J Am Heart Assoc* 2014;**3**:845-7.  
16  
17  
18 29 Yorifuji T, Kashima S. Associations of particulate matter with stroke mortality: a  
19  
20 multicity study in Japan. *J Occup Environ Med* 2013;**55**:768-71.  
21  
22  
23 30 Hart JE, Puett RC, Rexrode KM, *et al.* Effect Modification of Long - Term Air Pollution  
24  
25 Exposures and the Risk of Incident Cardiovascular Disease in US Women. *J Am Heart Assoc*  
26  
27 2015;**4**:e002301.  
28  
29  
30 31 Qiu H, Yu IT, Wang X, *et al.* Cool and dry weather enhances the effects of air pollution  
31  
32 on emergency IHD hospital admissions. *Int J Cardiol* 2013;**168**:500-5.  
33  
34  
35 32 Zhu N, Li H, Han M, *et al.* Environmental nitrogen dioxide (NO<sub>2</sub>) exposure influences  
36  
37 development and progression of ischemic stroke. *Toxicol lett* 2012;**214**:120-30.  
38  
39  
40 33 Andersen ZJ, Kristiansen LC, Andersen KK, *et al.* Stroke and long-term exposure to  
41  
42 outdoor air pollution from nitrogen dioxide: a cohort study. *Stroke* 2012;**43**:320-5.  
43  
44  
45 34 Dijkema MB, van Strien RT, van der Zee SC, *et al.* Spatial variation in nitrogen dioxide  
46  
47 concentrations and cardiopulmonary hospital admissions. *Environ Res* 2016;**151**:721-27.  
48  
49  
50 35 Liu H, Tian Y, Xu Y, *et al.* Association between ambient air pollution and hospitalization  
51  
52 for ischemic and hemorrhagic stroke in China: A multicity case-crossover study. *Environ*  
53  
54 *Pollut* 2017;**230**:234-41.  
55  
56

- 1  
2  
3  
4 36 Chen R, Zhang Y, Yang C, *et al.* Acute effect of ambient air pollution on stroke mortality  
5  
6 in the China air pollution and health effects study. *Stroke* 2013;**44**:954-60.  
7  
8  
9 37 Qian Y, Zhu M, Cai B, *et al.* Epidemiological evidence on association between ambient  
10  
11 air pollution and stroke mortality. *J Epidemiol Community Health* 2013;**67**:635-40.  
12  
13  
14 38 Cordonnier C, Sprigg N, Sandset EC, *et al.* Stroke in women - from evidence to  
15  
16 inequalities. *Neurology* 2017;**13**:521-32.  
17  
18  
19 39 Sang N, Yun Y, Li H, *et al.* SO<sub>2</sub> inhalation contributes to the development and  
20  
21 progression of ischemic stroke in the brain. *Toxicol Sci* 2010;**114**:226-36.  
22  
23  
24 40 Shah AS, Lee KK, McAllister DA, *et al.* Short term exposure to air pollution and stroke:  
25  
26 systematic review and meta-analysis. *Bmj* 2015;**350**:h1295.  
27  
28  
29 41 Huang F, Luo Y, Peng T, *et al.* Gaseous Air Pollution and the Risk for Stroke Admissions:  
30  
31 A Case-Crossover Study in Beijing, China. *Int J Environ Res Public Health* 2017;**14**:189.  
32  
33  
34 42 Zanobetti A, Schwartz J, Gold D. Are there sensitive subgroups for the effects of airborne  
35  
36 particles? *Environ Health Persp* 2000;**108**:841-5.  
37  
38  
39  
40  
41  
42  
43  
44  
45  
46  
47  
48  
49  
50  
51  
52  
53  
54  
55  
56  
57  
58  
59  
60

**Figure legends**

**Figure 1** The percentage change in daily ischemic stroke (IS) counts and daily IS deaths with an interquartile range increase in air pollutants levels on different lag days in single-pollutant models in Changzhou, 2015-2016. The data was expressed as mean with 95% confidence interval.

**Figure 2** The concentration-response relationships of daily ischemic stroke (IS) counts, daily IS deaths with air pollutants on different lag days (lag 0-5 for daily IS counts and lag 5 for daily IS deaths) in single-pollutant models in Changzhou, 2015-2016.

**Table 1** The means, medians and interquartile ranges (IQRs) for daily air pollutants and weather conditions variables in Changzhou, 2015-2016

| Variables                              | Mean± SD  | Min  | 25th | Median | 75th  | Max   | IQR  |
|----------------------------------------|-----------|------|------|--------|-------|-------|------|
| <b>Weather Condition</b>               |           |      |      |        |       |       |      |
| Temperature (°C)                       | 17.1±8.9  | -6.6 | 9.4  | 18.3   | 24.1  | 34.6  | 5.8  |
| Humidity (%)                           | 75.3±14.2 | 35.0 | 66.0 | 76.0   | 86.0  | 100.0 | 10.0 |
| <b>Air Pollutions</b>                  |           |      |      |        |       |       |      |
| PM <sub>2.5</sub> (µg/m <sup>3</sup> ) | 51.8±30.6 | 6.8  | 29.4 | 44.4   | 64.4  | 181.1 | 20.0 |
| PM <sub>10</sub> (µg/m <sup>3</sup> )  | 85.3±43.3 | 10.5 | 51.5 | 76.6   | 108.6 | 289.1 | 32.0 |
| NO <sub>2</sub> (µg/m <sup>3</sup> )   | 38.7±16   | 10.9 | 26.5 | 35.8   | 47.8  | 117.3 | 12.0 |
| SO <sub>2</sub> (µg/m <sup>3</sup> )   | 22.3±10   | 6.9  | 14.7 | 20.2   | 27.0  | 67.8  | 6.9  |
| CO (mg/m <sup>3</sup> )                | 1±0.3     | 0.4  | 0.8  | 1.0    | 1.2   | 2.6   | 0.2  |

PM<sub>2.5</sub>, particulate matter <2.5 mm in diameter; PM<sub>10</sub>, particulate matter <10 mm in diameter; NO<sub>2</sub>, nitrogen dioxide; SO<sub>2</sub>, sulfur dioxide; CO, carbon monoxide.



**Table 2** The percentage change in daily IS counts and deaths with an interquartile range increase in air pollutants levels modifying by age, gender and seasons in Changzhou, 2015-2016

| Variable                | Total                    | Age                      |                          | Sex                      |                          | Seasons                  |                          |
|-------------------------|--------------------------|--------------------------|--------------------------|--------------------------|--------------------------|--------------------------|--------------------------|
|                         |                          | ≤65                      | >65                      | Female                   | Male                     | Warm                     | Cold                     |
| <b>Daily IS counts*</b> |                          |                          |                          |                          |                          |                          |                          |
| PM <sub>2.5</sub>       | -0.063<br>(-0.215-0.088) | -0.246<br>(-0.568-0.076) | -0.042<br>(-0.21-0.127)  | -0.097<br>(-0.311-0.119) | -0.08<br>(-0.289-0.128)  | -0.149<br>(-0.525-0.228) | -0.098<br>(-0.267-0.071) |
| PM <sub>10</sub>        | -0.053<br>(-0.22-0.114)  | -0.219<br>(-0.572-0.136) | -0.004<br>(-0.191-0.184) | -0.086<br>(-0.324-0.153) | -0.047<br>(-0.279-0.185) | -0.057<br>(-0.41-0.297)  | -0.088<br>(-0.282-0.107) |
| NO <sub>2</sub>         | 0.208<br>(0.036-0.381)‡  | 0.258<br>(-0.075-0.592)  | 0.166<br>(-0.025-0.357)  | 0.168<br>(-0.055-0.391)  | 0.238<br>(0.002-0.475)‡  | -0.136<br>(-0.481-0.21)  | 0.382<br>(0.169-0.596)‡  |
| SO <sub>2</sub>         | 0.125<br>(-0.034-0.284)  | -0.044<br>(-0.364-0.277) | 0.113<br>(-0.062-0.289)  | 0.15<br>(-0.068-0.369)   | 0.056<br>(-0.162-0.275)  | -0.309<br>(-0.651-0.033) | 0.298<br>(0.099-0.498)‡  |
| CO                      | -0.078<br>(-0.22-0.064)  | -0.213<br>(-0.511-0.086) | -0.061<br>(-0.222-0.1)   | -0.151<br>(-0.355-0.053) | -0.007<br>(-0.206-0.192) | -0.175<br>(-0.432-0.083) | -0.053<br>(-0.237-0.131) |
| <b>Daily IS deaths†</b> |                          |                          |                          |                          |                          |                          |                          |
| PM <sub>2.5</sub>       | 0.228<br>(-0.005-0.462)  | 1.144<br>(0.329-1.965)‡  | 0.152<br>(-0.091-0.395)  | 0.124<br>(-0.19-0.439)   | 0.29<br>(-0.043-0.625)   | -0.199<br>(-0.77-0.375)  | 0.184<br>(-0.088-0.456)  |
| PM <sub>10</sub>        | 0.268<br>(0.007-0.528)‡  | 1.52<br>(0.656-2.391)‡   | 0.152<br>(-0.12-0.424)   | 0.093<br>(-0.261-0.448)  | 0.404<br>(0.03-0.78)‡    | -0.012<br>(-0.53-0.509)  | 0.247<br>(-0.075-0.57)   |
| NO <sub>2</sub>         | 0.263<br>(0.004-0.522)‡  | 0.894<br>(0.058-1.736)‡  | 0.195<br>(-0.073-0.463)  | 0.37<br>(0.027-0.715)‡   | 0.132<br>(-0.247-0.512)  | 0.275<br>(-0.222-0.775)  | 0.198<br>(-0.13-0.528)   |
| SO <sub>2</sub>         | 0.34<br>(0.088-0.592)‡   | 0.67<br>(-0.175-1.523)   | 0.307<br>(0.045-0.57)‡   | 0.434<br>(0.096-0.772)‡  | 0.215<br>(-0.15-0.58)    | 0.017<br>(-0.493-0.531)  | 0.388<br>(0.081-0.696)‡  |
| CO                      | 0.175<br>(-0.042-0.392)  | 0.9<br>(0.166-1.639)‡    | 0.108<br>(-0.118-0.335)  | 0.189<br>(-0.11-0.49)    | 0.154<br>(-0.162-0.471)  | 0.02<br>(-0.401-0.443)   | 0.169<br>(-0.104-0.443)  |

\*The multivariable regression model fits the pollutants for daily IS counts data at lag 0-5 and

adjusts for calendar time (df=5), DOW (df=7), daily average humidity (df=5) and average

temperature (df=5).

†The multivariable regression model fits the pollutants for daily IS deaths data at lag 5 and adjusts

for calendar time (df=5), DOW (df=7), daily average humidity (df=5) and average temperature

(df=5).

1  
2  
3 ‡ Statistically positive association between air pollutants and daily IS counts or deaths  
4  
5

6 The data was expressed as mean with 95% confidence interval.  
7  
8  
9  
10  
11  
12  
13  
14  
15  
16  
17  
18  
19  
20  
21  
22  
23  
24  
25  
26  
27  
28  
29  
30  
31  
32  
33  
34  
35  
36  
37  
38  
39  
40  
41  
42  
43  
44  
45  
46  
47  
48  
49  
50  
51  
52  
53  
54  
55  
56  
57  
58  
59  
60

For peer review only

**Table 3** The percent increases in daily IS counts and deaths with each interquartile range increment in air pollutants levels in two-pollutants models in Changzhou, 2015-2016

| Variables         | PM <sub>2.5</sub>         | PM <sub>10</sub>          | NO <sub>2</sub>         | SO <sub>2</sub>          | CO                        |
|-------------------|---------------------------|---------------------------|-------------------------|--------------------------|---------------------------|
| Daily IS counts   |                           |                           |                         |                          |                           |
| PM <sub>2.5</sub> | -0.063<br>(-0.215-0.088)  | 0.25<br>(-0.314-0.817)    | 0.497<br>(0.259-0.735)‡ | 0.305<br>(0.083-0.527) ‡ | -0.059<br>(-0.274-0.157)  |
| PM <sub>10</sub>  | -0.423<br>(-0.881-0.038)  | -0.053<br>(-0.22-0.114)   | 0.539<br>(0.29-0.788)‡  | 0.262<br>(0.034-0.491) ‡ | -0.065<br>(-0.293-0.163)  |
| NO <sub>2</sub>   | -0.346<br>(-0.558--0.134) | -0.438<br>(-0.691--0.185) | 0.208<br>(0.036-0.381)‡ | -0.007<br>(-0.267-0.253) | -0.341<br>(-0.556--0.124) |
| SO <sub>2</sub>   | -0.24<br>(-0.46--0.019)   | -0.244<br>(-0.49-0.003)   | 0.22<br>(-0.067-0.507)  | 0.125<br>(-0.034-0.284)  | -0.166<br>(-0.356-0.023)  |
| CO                | -0.089<br>(-0.314-0.137)  | 0.029<br>(-0.223-0.281)   | 0.45<br>(0.215-0.685)‡  | 0.172<br>(-0.016-0.361)  | -0.078<br>(-0.22-0.064)   |
| Daily IS deaths   |                           |                           |                         |                          |                           |
| PM <sub>2.5</sub> | 0.228<br>(-0.005-0.462)   | 0.436<br>(-0.36-1.238)    | 0.22<br>(-0.127-0.567)  | 0.28<br>(-0.071-0.632)   | 0.065<br>(-0.314-0.446)   |
| PM <sub>10</sub>  | 0.211<br>(-0.463-0.89)    | 0.268<br>(0.007-0.528)‡   | 0.218<br>(-0.135-0.573) | 0.295<br>(-0.055-0.646)  | 0.137<br>(-0.23-0.504)    |
| NO <sub>2</sub>   | 0.106<br>(-0.201-0.414)   | 0.149<br>(-0.21-0.509)    | 0.263<br>(0.004-0.522)‡ | 0.351<br>(-0.096-0.8)    | 0.057<br>(-0.269-0.384)   |
| SO <sub>2</sub>   | 0.066<br>(-0.25-0.383)    | 0.126<br>(-0.242-0.496)   | 0.066<br>(-0.387-0.521) | 0.34<br>(0.088-0.592)‡   | 0.035<br>(-0.281-0.351)   |
| CO                | 0.186<br>(-0.199-0.571)   | 0.233<br>(-0.187-0.656)   | 0.23<br>(-0.14-0.601)   | 0.346<br>(0.002-0.691)‡  | 0.175<br>(-0.042-0.392)   |

\*The multivariable regression model fits the pollutants for daily IS counts data at lag 0-5 and

adjusts for the other pollutants, calendar time (df=5), DOW (df=7), daily average humidity (df=5)

and average temperature (df=5).

†The multivariable regression model fits the pollutants for daily IS deaths data at lag 5 and adjusts

for the other pollutants, calendar time (df=5), DOW (df=7), daily average humidity (df=5) and

average temperature (df=5).

1  
2  
3 ‡ Statistically positive association between air pollutants and daily IS counts or deaths  
4  
5

6 The data was expressed as mean with 95% confidence interval.  
7  
8  
9  
10  
11  
12  
13  
14  
15  
16  
17  
18  
19  
20  
21  
22  
23  
24  
25  
26  
27  
28  
29  
30  
31  
32  
33  
34  
35  
36  
37  
38  
39  
40  
41  
42  
43  
44  
45  
46  
47  
48  
49  
50  
51  
52  
53  
54  
55  
56  
57  
58  
59  
60

For peer review only

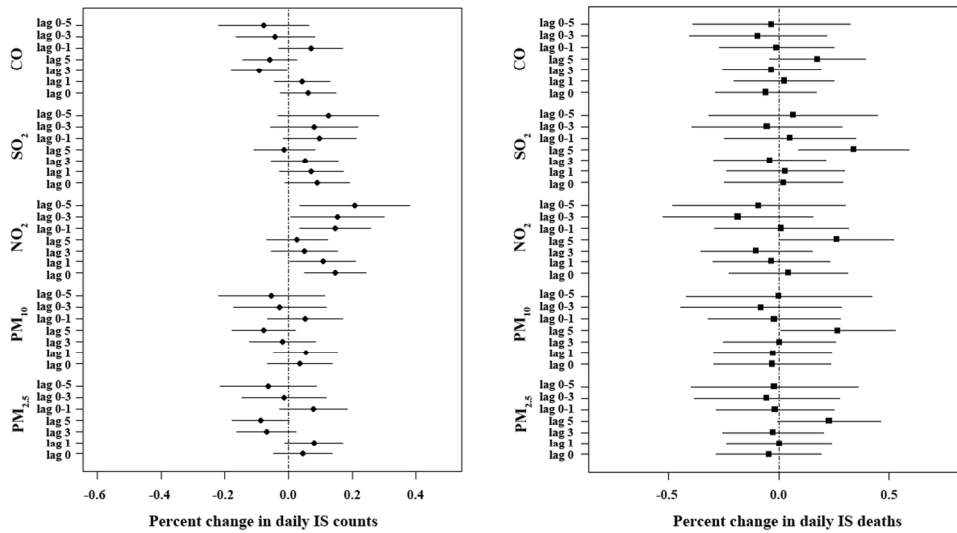

Figure 1 The percentage change in daily ischemic stroke (IS) counts and daily IS deaths with an interquartile range increase in air pollutants levels on different lag days in single-pollutant models in Changzhou, 2015-2016. The data was expressed as mean with 95% confidence interval.

86x48mm (600 x 600 DPI)

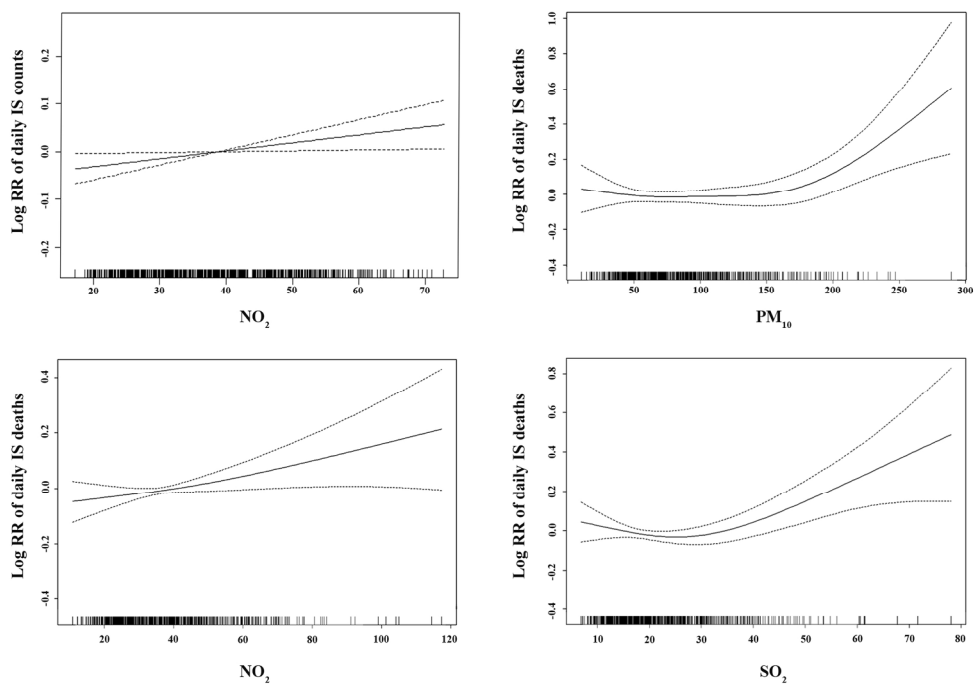

Figure 2 The concentration-response relationships of daily ischemic stroke (IS) counts, daily IS deaths with air pollutants on different lag days (lag 0-5 for daily IS counts and lag 5 for daily IS deaths) in single-pollutant models in Changzhou, 2015-2016.

107x75mm (600 x 600 DPI)

1  
2  
3  
4 **Acute effects of air pollution on ischemic stroke onsets and deaths: A time-series**  
5  
6  
7 **study in Changzhou, China**  
8  
9

10  
11  
12 Huibin Dong<sup>1, a</sup>, Yongquan Yu<sup>2, a</sup>, Shen Yao<sup>2</sup>, Yan Lu<sup>3</sup>, Zhiyong Chen<sup>1</sup>, Guiying Li<sup>1</sup>,

13  
14 Yao Yao<sup>1</sup>, Xingjuan Yao<sup>1</sup>, Shou-Lin Wang<sup>2</sup>, Zhan Zhang<sup>4\*</sup>  
15  
16

17  
18  
19 **Supplementary data**  
20  
21  
22  
23  
24  
25  
26  
27  
28  
29  
30  
31  
32  
33  
34  
35  
36  
37  
38  
39  
40  
41  
42  
43  
44  
45  
46  
47  
48  
49  
50  
51  
52  
53  
54  
55  
56  
57  
58  
59  
60

**Table S1** The descriptive statistics for daily ischemic stroke (IS) counts and deaths in Changzhou, 2015-2016\*

| Variables       | Mean± SD  | Min  | 25th | Median | 75th | Max  |
|-----------------|-----------|------|------|--------|------|------|
| Daily IS counts | 45.4±11.2 | 14.0 | 38.0 | 45.0   | 53.0 | 99.0 |
| Male            | 23.7±7    | 6.0  | 19.0 | 23.0   | 28.0 | 60.0 |
| Female          | 21.8±6.1  | 6.0  | 18.0 | 22.0   | 26.0 | 48.0 |
| <65             | 8.5±3.6   | 0.0  | 6.0  | 8.0    | 11.0 | 23.0 |
| ≥65             | 36.9±9.2  | 11.0 | 31.0 | 36.0   | 43.0 | 80.0 |
| Daily IS deaths | 5.6±2.9   | 0.0  | 3.0  | 5.0    | 7.0  | 19.0 |
| Male            | 2.7±1.8   | 0.0  | 1.0  | 3.0    | 4.0  | 10.0 |
| Female          | 2.8±2     | 0.0  | 1.0  | 3.0    | 4.0  | 10.0 |
| <65             | 0.4±0.7   | 0.0  | 0.0  | 0.0    | 1.0  | 3.0  |
| ≥65             | 5.1±2.8   | 0.0  | 3.0  | 5.0    | 7.0  | 18.0 |

\*A total of 32,840 IS cases and 4,028 IS deaths recorded were recorded during the study period.



STROBE Statement—Checklist of items that should be included in reports of *cross-sectional studies*

|                              | Item No | Recommendation                                                                                                                                                                                                                                                                                                                                                                                                |
|------------------------------|---------|---------------------------------------------------------------------------------------------------------------------------------------------------------------------------------------------------------------------------------------------------------------------------------------------------------------------------------------------------------------------------------------------------------------|
| <b>Title and abstract</b>    | 1-4     | Acute effects of air pollution on ischemic stroke onsets and deaths: A time-series study in Changzhou, China<br>(b) Provide in the abstract an informative and balanced summary of what was done and what was found                                                                                                                                                                                           |
| <b>Introduction</b>          |         |                                                                                                                                                                                                                                                                                                                                                                                                               |
| Background/rationale         | 5-6     | Explain the scientific background and rationale for the investigation being reported                                                                                                                                                                                                                                                                                                                          |
| Objectives                   | 6       | State specific objectives, including any prespecified hypotheses                                                                                                                                                                                                                                                                                                                                              |
| <b>Methods</b>               |         |                                                                                                                                                                                                                                                                                                                                                                                                               |
| Study design                 | 7-9     | Present key elements of study design early in the paper                                                                                                                                                                                                                                                                                                                                                       |
| Setting                      | 7       | Describe the setting, locations, and relevant dates, including periods of recruitment, exposure, follow-up, and data collection                                                                                                                                                                                                                                                                               |
| Participants                 | 7       | (a) Give the eligibility criteria, and the sources and methods of selection of participants                                                                                                                                                                                                                                                                                                                   |
| Variables                    | 8       | Clearly define all outcomes, exposures, predictors, potential confounders, and effect modifiers. Give diagnostic criteria, if applicable                                                                                                                                                                                                                                                                      |
| Data sources/<br>measurement | 7*      | For each variable of interest, give sources of data and details of methods of assessment (measurement). Describe comparability of assessment methods if there is more than one group                                                                                                                                                                                                                          |
| Bias                         | 7-8     | Describe any efforts to address potential sources of bias                                                                                                                                                                                                                                                                                                                                                     |
| Study size                   | 7       | Explain how the study size was arrived at                                                                                                                                                                                                                                                                                                                                                                     |
| Quantitative variables       | 8       | Explain how quantitative variables were handled in the analyses. If applicable, describe which groupings were chosen and why                                                                                                                                                                                                                                                                                  |
| Statistical methods          | 9       | (a) Describe all statistical methods, including those used to control for confounding<br>(b) Describe any methods used to examine subgroups and interactions<br>(c) Explain how missing data were addressed<br>(d) If applicable, describe analytical methods taking account of sampling strategy<br>(e) Describe any sensitivity analyses                                                                    |
| <b>Results</b>               |         |                                                                                                                                                                                                                                                                                                                                                                                                               |
| Participants                 | 9*      | (a) Report numbers of individuals at each stage of study—eg numbers potentially eligible, examined for eligibility, confirmed eligible, included in the study, completing follow-up, and analysed<br>(b) Give reasons for non-participation at each stage<br>(c) Consider use of a flow diagram                                                                                                               |
| Descriptive data             | 9*      | (a) Give characteristics of study participants (eg demographic, clinical, social) and information on exposures and potential confounders<br>(b) Indicate number of participants with missing data for each variable of interest                                                                                                                                                                               |
| Outcome data                 | 10-11*  | Report numbers of outcome events or summary measures                                                                                                                                                                                                                                                                                                                                                          |
| Main results                 | 10-11   | (a) Give unadjusted estimates and, if applicable, confounder-adjusted estimates and their precision (eg, 95% confidence interval). Make clear which confounders were adjusted for and why they were included<br>(b) Report category boundaries when continuous variables were categorized<br>(c) If relevant, consider translating estimates of relative risk into absolute risk for a meaningful time period |

|                          |       |                                                                                                                                                                            |
|--------------------------|-------|----------------------------------------------------------------------------------------------------------------------------------------------------------------------------|
| Other analyses           | 10-11 | Report other analyses done—eg analyses of subgroups and interactions, and sensitivity analyses                                                                             |
| <b>Discussion</b>        |       |                                                                                                                                                                            |
| Key results              | 11    | Summarise key results with reference to study objectives                                                                                                                   |
| Limitations              | 12-13 | Discuss limitations of the study, taking into account sources of potential bias or imprecision. Discuss both direction and magnitude of any potential bias                 |
| Interpretation           | 12-13 | Give a cautious overall interpretation of results considering objectives, limitations, multiplicity of analyses, results from similar studies, and other relevant evidence |
| Generalisability         | 14    | Discuss the generalisability (external validity) of the study results                                                                                                      |
| <b>Other information</b> |       |                                                                                                                                                                            |
| Funding                  | 14    | Give the source of funding and the role of the funders for the present study and, if applicable, for the original study on which the present article is based              |

\*Give information separately for exposed and unexposed groups.

**Note:** An Explanation and Elaboration article discusses each checklist item and gives methodological background and published examples of transparent reporting. The STROBE checklist is best used in conjunction with this article (freely available on the Web sites of PLoS Medicine at <http://www.plosmedicine.org/>, Annals of Internal Medicine at <http://www.annals.org/>, and Epidemiology at <http://www.epidem.com/>). Information on the STROBE Initiative is available at [www.strobe-statement.org](http://www.strobe-statement.org).

# BMJ Open

## Acute effects of air pollution on ischaemic stroke onset and deaths: A time-series study in Changzhou, China

|                                 |                                                                                                                                                                                                                                                                                                                                                                                                                                                                                                                                                                              |
|---------------------------------|------------------------------------------------------------------------------------------------------------------------------------------------------------------------------------------------------------------------------------------------------------------------------------------------------------------------------------------------------------------------------------------------------------------------------------------------------------------------------------------------------------------------------------------------------------------------------|
| Journal:                        | <i>BMJ Open</i>                                                                                                                                                                                                                                                                                                                                                                                                                                                                                                                                                              |
| Manuscript ID                   | bmjopen-2017-020425.R2                                                                                                                                                                                                                                                                                                                                                                                                                                                                                                                                                       |
| Article Type:                   | Research                                                                                                                                                                                                                                                                                                                                                                                                                                                                                                                                                                     |
| Date Submitted by the Author:   | 10-May-2018                                                                                                                                                                                                                                                                                                                                                                                                                                                                                                                                                                  |
| Complete List of Authors:       | Dong, Huibin; Changzhou Center for Disease Control and Prevention<br>Yu, Yongquan; Nanjing Medical University<br>Yao, Shen; Nanjing Medical University<br>Lu, Yan; The First Affiliated Hospital of Nanjing Medical University<br>Chen, Zhiyong; Changzhou Center for Disease Control and Prevention<br>Li, Guiying; Changzhou Center for Disease Control and Prevention<br>Yao, Yao; Changzhou Center for Disease Control and Prevention<br>Yao, Xingjuan ; Changzhou Center for Disease Control and Prevention<br>Wang, Shoulin; Nanjing Medical University<br>Zhang, Zhan |
| <b>Primary Subject Heading</b>: | Epidemiology                                                                                                                                                                                                                                                                                                                                                                                                                                                                                                                                                                 |
| Secondary Subject Heading:      | Occupational and environmental medicine, Cardiovascular medicine                                                                                                                                                                                                                                                                                                                                                                                                                                                                                                             |
| Keywords:                       | Cardiac Epidemiology < CARDIOLOGY, Ischaemic heart disease < CARDIOLOGY, PUBLIC HEALTH                                                                                                                                                                                                                                                                                                                                                                                                                                                                                       |
|                                 |                                                                                                                                                                                                                                                                                                                                                                                                                                                                                                                                                                              |

SCHOLARONE™  
Manuscripts

1  
2  
3  
4 **Acute effects of air pollution on ischaemic stroke onset and deaths: A time-series**  
5  
6 **study in Changzhou, China**  
7  
8  
9

10 Huibin Dong<sup>1, a</sup>, Yongquan Yu<sup>2, a</sup>, Shen Yao<sup>2</sup>, Yan Lu<sup>3</sup>, Zhiyong Chen<sup>1</sup>, Guiying Li<sup>1</sup>,

11  
12  
13 Yao Yao<sup>1</sup>, Xingjuan Yao<sup>1</sup>, Shou-Lin Wang<sup>2</sup>, Zhan Zhang<sup>4\*</sup>  
14

15  
16 <sup>1</sup>Department of Chronic Disease Control and Prevention, Changzhou Center for  
17  
18 Disease Control and Prevention, 203 Taishan Road, Changzhou, Jiangsu, 213022, PR  
19  
20 China.  
21

22  
23 <sup>2</sup>Department of Occupational Medicine and Environmental Health, School of Public  
24  
25 Health, Nanjing Medical University, 101 Longmian Avenue, Nanjing, Jiangsu,  
26  
27 211166, P. R. China.  
28

29  
30 <sup>3</sup>Department of Cardiology, The First Affiliated Hospital of Nanjing Medical  
31  
32 University, 300 Guangzhou Road, Nanjing 210029, People's Republic of China.  
33  
34

35  
36 <sup>4</sup>Department of Hygiene Analysis and Detection, School of Public Health, Nanjing  
37  
38 Medical University, 101 Longmian Avenue, Nanjing, Jiangsu, 211166, P. R. China.  
39

40 <sup>a</sup> These authors contributed equally to this work.  
41  
42  
43

44 **\*Correspondence to:**  
45

46 Zhan Zhang, Department of Hygiene Analysis and Detection, School of Public Health,  
47  
48 Nanjing Medical University, 101 Longmian Avenue, Nanjing, Jiangsu, 211166, P. R.  
49  
50 China.  
51

52  
53  
54 Tel.: +86-25-8686-8402  
55  
56

Fax: +86-25-8686-8499

E-mail: [zhanzhang@njmu.edu.cn](mailto:zhanzhang@njmu.edu.cn)

For peer review only

## ABSTRACT

**Objective** To investigate the acute effect of air pollutants on ischaemic stroke (IS) and IS-related death.

**Setting** Five urban districts in Changzhou, China, between 9 January 2015 and 31 December 2016.

**Participants** A total of 32,840 IS cases and 4,028 IS deaths were enrolled.

**Main outcome measures** A time-series design, generalized additive model and multivariable regression model were used to examine the percentage change (95% confidence interval [CI]) in daily IS counts and deaths with an interquartile range (IQR) increase in air pollutant levels for different single or multiple lag days in single-pollutant and two-pollutant models.

**Results** Daily IS counts increased 0.208% (95% [CI]: 0.036%-0.381%) with an IQR increment in levels of NO<sub>2</sub>. The estimated risk of NO<sub>2</sub> was more robust in males and in the cold season. For daily IS counts, the estimated effects of NO<sub>2</sub> and SO<sub>2</sub> were more significant when adjusted for PM<sub>2.5</sub> and PM<sub>10</sub>. An IQR increment in the concentration of PM<sub>10</sub>, SO<sub>2</sub> and NO<sub>2</sub> significantly increased IS deaths with 6 days of cumulative effects (0.268%, 95% CI: 0.007%-1.528%; 0.34%, 0.088%-0.592%; and 0.263%, 0.004%-0.522%, respectively). Young individuals (< 65 years old) had a higher IS mortality risk for PM<sub>2.5</sub>, PM<sub>10</sub>, NO<sub>2</sub> and CO. For IS death, the effect estimates of SO<sub>2</sub> in the elderly, females and the cold season were more pronounced; statistical significance was also identified for SO<sub>2</sub> when adjusted for CO.

1  
2  
3 **Conclusions** This study suggested that short-term exposure to ambient NO<sub>2</sub> was  
4  
5 associated with increased IS risk. In addition, SO<sub>2</sub> was associated with increased IS  
6  
7 onset and death.  
8  
9

## 10 11 12 **Article Summary**

### 13 14 **Strengths and limitations of this study**

- 15  
16  
17 ■ This is the first comprehensive research in China that explores the short-term  
18 effects of air pollutants on the morbidity and mortality of stroke concurrently.
- 19  
20  
21 ■ The statistical power to detect the association was sufficient because of the  
22 substantial numbers of IS cases and IS deaths recorded in our work.
- 23  
24  
25 ■ This time-series study evaluated the association of modifiers between air  
26 pollution and daily IS counts or deaths, which may provide clues for the primary  
27 prevention of IS and IS-related death.
- 28  
29  
30 ■ The exposure measurement of this study was performed at the community level,  
31 and we could not precisely quantify the exposure of individuals to air pollutants  
32 using the fixed-site monitoring data; this may lead to exposure measurement  
33 error.
- 34  
35  
36 ■ This study considers a single city, and the results should be extrapolated with  
37 caution.  
38  
39  
40  
41  
42  
43  
44  
45  
46  
47  
48  
49  
50  
51  
52  
53  
54  
55  
56  
57  
58  
59  
60

## INTRODUCTION

Air pollution is considered a primary risk factor for a mounting total of pollution-related diseases and deaths [1]. Moreover, as a modifiable risk factor, air pollution accounts for more than 7 million deaths annually [2]. Studies have extensively explored the association between air pollution and the risk of respiratory, reproductive and cardiovascular diseases [3-5]. Epidemiological studies have suggested that exposure to air pollutants on hazy days may increase the risk of cardiovascular diseases [6-8]. For instance, a study conducted in Stockholm suggested that short-term exposure to particulate matter with aerodynamic diameters  $< 2.5 \mu\text{m}$  ( $\text{PM}_{2.5}$ ) was associated with out-of-hospital cardiac arrest. Increments in  $\text{PM}_{2.5}$ ,  $\text{PM}_{10}$ , nitrogen dioxide ( $\text{NO}_2$ ), sulfur dioxide ( $\text{SO}_2$ ) and carbon monoxide ( $\text{CO}$ ) were associated with higher risk of heart failure hospitalizations and death. A study conducted in Stockholm suggested that short-term exposure to  $\text{PM}_{2.5}$  was associated with out-of-hospital cardiac arrest. A meta-analysis indicated that long-term exposure to  $\text{PM}_{2.5}$  was related to a dramatic increase in cardiovascular mortality [9].

Stroke is a persistent neurological deficit caused by cerebrovascular damage and includes ischaemic stroke (IS) and haemorrhagic stroke (HS) [10-12]. Stroke is one of the leading causes of death and disability-adjusted life years worldwide [13, 14]. In 2010, the estimated number of individuals who suffered from stroke was 50 million, and among them, approximately 17 million cases were newly identified. China bears an enormous stroke burden in the world, having the highest stroke prevalence, incidence and mortality among developing countries worldwide [15]. As the major



1  
2  
3 subtype of stroke in China, IS accounts for 43% to 79% of all strokes and has recently  
4 prompted growing concerns [16]. Given the tremendous disease burden of stroke, the  
5 identification and prevention of risk factors are critical and effective public health  
6 strategies [17]. However, the effect of air pollutants remains a matter of debate, which  
7 might be, at least in part, explained by the heterogeneity of different stroke subtypes  
8 [18, 19]. Thus, there is a pressing need to systematically explore the association  
9 between air pollutants and specific subtypes of stroke-related incidence and mortality.  
10  
11  
12  
13  
14  
15  
16  
17  
18  
19

20 Changzhou stands on the southern bank of the Yangtze River. The city is as part  
21 of the Suzhou-Wuxi-Changzhou metropolitan area, and by the year of 2010, there  
22 were approximately 4 million residents in five urban districts (Tianning district, Wujin  
23 district, Jintan district, Xinbei district and Liyang city) [20]. Moreover, because of the  
24 rapid industrialization and economic development of the past years, Changzhou is  
25 now experiencing severe air pollution. The concentrations of several air pollutants  
26 (such as PM<sub>2.5</sub>, PM<sub>10</sub>, SO<sub>2</sub> and NO<sub>2</sub>) were equal or higher than the national ambient  
27 air quality in the recent years [21, 22]. Therefore, Changzhou was chosen as a suitable  
28 place to study the effect of air pollution on the incidence and mortality of IS. In this  
29 research, a comprehensive time-series study was conducted in Changzhou to examine  
30 the association between main air pollutants and daily IS counts and deaths. To explore  
31 the modification effect, the association of modifiers between air pollution and daily IS  
32 counts and deaths was also evaluated. This work will help provide insights into the  
33 relationship between stroke and air pollutants and have implications for the  
34 prevention of IS onset and IS-related deaths.  
35  
36  
37  
38  
39  
40  
41  
42  
43  
44  
45  
46  
47  
48  
49  
50  
51  
52  
53  
54  
55  
56  
57  
58  
59  
60

## MATERIALS AND METHODS

### Data collection

Air pollution data, including daily 24-hour average levels of PM<sub>2.5</sub>, PM<sub>10</sub>, NO<sub>2</sub>, SO<sub>2</sub> and CO between January 9, 2015, and December 31, 2016, were obtained from ten air quality monitoring stations run by the Changzhou Environmental Monitoring Center. The daily mean levels for air pollutants were averaged from all the stations, and approximately all the patients whose cases were recorded in this study resided less than 40 km from the nearest monitoring station. Thus, the monitoring data could be used as an appropriate proxy for personal exposure [23-25]. Daily meteorological data on temperature (°C) and relative humidity (%) were collected from the Changzhou Meteorological Bureau.

Daily IS and IS mortality data from 9 January 2015 to 31 December 31 2016 were obtained from the database of the Changzhou Center for Disease Control and Prevention (CDC). This database belonged to the government-controlled network reporting system for chronic diseases, which was established in Changzhou in 2012. Cardiovascular physicians were responsible for the diagnosis of IS according to the cerebrovascular ICD-10 codes for IS (I63). Demographic data were collected from the Changzhou Municipal Bureau of Statistics. Daily IS counts and deaths were also stratified into groups by sex (male and female) and age group (<65 and ≥ 65 years) to explore the effect modification of individual characteristics.

### Statistical analysis

Daily IS counts, daily IS death counts, air pollutant levels and weather data were

1  
2  
3 linked by date for the subsequent time-series study, which was used to analyse the  
4  
5 effects of each air pollutant on IS counts and deaths. After evaluating the distribution  
6  
7 patterns of daily IS counts and deaths, Poisson distributions were identified. Poisson  
8  
9 regression was used in a generalized additive model (GAM) to analyse the data. A  
10  
11 multivariable regression model was used to detect the air pollutant-related  
12  
13 associations and control for the potential confounding factors, such as calendar time,  
14  
15 day of week (DOW), daily average relative humidity and temperature. The five  
16  
17 degrees of freedom (df) was used to adjust for all the confounding factors mentioned  
18  
19 above except for DOW (df=7). Furthermore, to explore the potential modifications,  
20  
21 data were stratified by sex, age (<65 as young individuals and ≥65 as elderly  
22  
23 individuals) and season (warm season as 1 May to 31 October and cold season as 1  
24  
25 November to 30 April). Associations between air pollutants and IS and IS-related  
26  
27 death were separately examined according to the following equation:

$$\text{Log}[E(T/D_n)] = \text{intercept} + \beta_1 \text{AirPollution}_{n-i} + \beta_2 \text{DOW} + \text{ps}(\text{calendar time, df=7}) + \text{ps}(\text{Temp}_{n-i}, \text{df=5}) + \text{ps}(\text{Relative Humidity}_{n-i}, \text{df=5})$$

34  
35  
36  
37  
38  $E(T/D_n)$  represents the estimated numbers of IS onset or death on day n;

39  
40  $\text{AirPollution}_{n-i}$  represents the average level of different air pollutants on day n and i is  
41  
42 the day lag;  $\beta$  is the vector of the coefficients; DOW is the day of week; ps ()  
43  
44 represents a penalized spline function;  $\text{Temp}_{n-i}$  and  $\text{Relative Humidity}_{n-i}$  represent  
45  
46 average temperature and relative humidity on day n and i is the day lag.  
47  
48

49  
50 In addition, for both daily IS counts and deaths, single-pollutant models were  
51  
52 fitted with different single lag days (lag0, lag1, lag3 and lag5) to detect the effects of  
53  
54 air pollution on IS. As underestimation may occur in single-day models, multiple-day  
55  
56

1  
2  
3 lag models (lag0-1, lag0-3 and lag0-5) were also applied in this study. The smoothing  
4  
5  
6 function was used in the analysis of the exposure-response relationship between the  
7  
8 log-relative risk of daily IS counts or deaths and air pollutant concentrations using a 5  
9  
10  
11 df in a single-pollutant model.

12  
13 Statistical software R (version 3.2.3, R Foundation for Statistical Computing,  
14  
15 Austria) was used for data analysis and result output. The baseline data was presented  
16  
17 as the mean  $\pm$  standard deviation (SD) for continuous variables. All tests were  
18  
19 two-sided, and  $P < 0.05$  was considered as statistically significant.  
20  
21

## 22 23 **Public and patient involvement**

24  
25 Public and patient involvement (PPI) was central and integral in the present study.  
26  
27 The PPI group consisted of three male and four female representative patients who  
28  
29 were recruited and chaired by HD. The members of the existing group were involved  
30  
31 throughout all stages of this research to make contributions. At the outset, they helped  
32  
33 researchers with choosing topics and designing the study by providing constructive  
34  
35 suggestions. Furthermore, they took part in the conference presentations and group  
36  
37 discussions to help filter and interpret data collected from the database mentioned  
38  
39 above. They also contributed to discussions about the implications of the results by  
40  
41 drawing on their experiences. Findings were disseminated to all PPI members at the  
42  
43 end of the study.  
44  
45  
46  
47  
48  
49  
50  
51

## 52 53 **RESULTS**

### 54 55 **Descriptive Analysis**

1  
2  
3 During this study period, there were 32,840 IS cases and 4,028 IS deaths recorded.  
4  
5 For IS, on average, 45.4 cases were identified each day (Table S1). Of these, 52.2%  
6  
7 were males and 81.3% were the elderly ( $\geq 65$ ). In addition, for IS-related death, there  
8  
9 were 5.6 deaths recorded on average each day (Table S1). Of these, 48.2% were males  
10  
11 and 96.4% were the elderly.  
12  
13

14  
15 The daily average meteorological data were 17.0°C for temperature and 75% for  
16  
17 relative humidity. The daily average levels were 51.8  $\mu\text{g}/\text{m}^3$  for  $\text{PM}_{2.5}$ , 85.3  $\mu\text{g}/\text{m}^3$  for  
18  
19  $\text{PM}_{10}$ , 22.3  $\mu\text{g}/\text{m}^3$  for  $\text{SO}_2$ , 38.7  $\mu\text{g}/\text{m}^3$  for  $\text{NO}_2$  and 1  $\text{mg}/\text{m}^3$  for CO (Table 1).  
20  
21 According to the WHO air quality guidelines (25  $\mu\text{g}/\text{m}^3$  for  $\text{PM}_{2.5}$ , 50  $\mu\text{g}/\text{m}^3$  for  $\text{PM}_{10}$   
22  
23 and 20  $\mu\text{g}/\text{m}^3$  for  $\text{SO}_2$ ), the corresponding average levels of  $\text{PM}_{2.5}$ ,  $\text{PM}_{10}$  and  $\text{SO}_2$  in  
24  
25 Changzhou were far beyond the WHO standard.  
26  
27  
28

### 29 30 **Estimated Effects of Air Pollutants**

31  
32 Figure 1 summarizes the percentage change (95% CI) in daily IS counts and deaths  
33  
34 with an interquartile range (IQR) increase in air pollutant levels for different single or  
35  
36 multiple lag days in single-pollutant models. For daily IS counts, a statistically  
37  
38 positive association was observed only for an IQR increment of  $\text{NO}_2$  levels, and this  
39  
40 association was more significant for multi-day exposure than for single day exposure.  
41  
42 The highest association was observed for lag 0-5 (0.208%, 0.036%-0.381%) and was  
43  
44 used in the subsequent study. For daily IS deaths, statistically positive associations  
45  
46 were observed for the different IQRs increments of  $\text{PM}_{10}$ ,  $\text{SO}_2$  and  $\text{NO}_2$ . All  
47  
48 associations were the most significant at lag5 (0.268%, 0.007%-0.528% for  $\text{PM}_{10}$ ;  
49  
50 0.34%, 0.088%-0.592% for  $\text{SO}_2$ ; 0.263%, and 0.004%-0.522% for  $\text{NO}_2$ ) than at other  
51  
52  
53  
54  
55  
56  
57  
58  
59  
60

1  
2  
3  
4 days and thus a 5 day lag model was used in the subsequent analysis.  
5

6 Concentration-response relationships of air pollutants with daily IS counts or  
7  
8 deaths are presented in Figure 2. For IS counts, the curve of NO<sub>2</sub> was linear positive  
9  
10 and flat at higher concentrations. For daily IS deaths, the concentration-response  
11  
12 curves of PM<sub>10</sub> and SO<sub>2</sub> were similar, that is, flat at low levels and dramatically linear  
13  
14 positive at high levels, whereas the curve for NO<sub>2</sub> suggest a linear rise in daily IS  
15  
16 deaths.  
17  
18  
19

20 The effect of NO<sub>2</sub> on the increase of daily IS counts was more pronounced  
21  
22 among males than among females, and the effects of NO<sub>2</sub> and SO<sub>2</sub> on daily IS counts  
23  
24 were stronger in the cold season than in the warm season. No significant association  
25  
26 was observed when modifying by age (Table 2). For daily IS deaths, the estimated  
27  
28 effect of PM<sub>10</sub> was more pronounced among males, whereas the effects of NO<sub>2</sub> and  
29  
30 SO<sub>2</sub> were more robust among females. Moreover, PM<sub>2.5</sub>, PM<sub>10</sub>, NO<sub>2</sub> and CO were  
31  
32 found to have greater deleterious effects among young individuals, and SO<sub>2</sub> showed  
33  
34 greater risk in the elderly. In addition, when modifying by seasons, statistical  
35  
36  
37  
38  
39  
40  
41  
42  
43  
44  
45  
46  
47  
48  
49  
50  
51  
52  
53  
54  
55  
56  
57  
58  
59  
60  
significance was noted only for SO<sub>2</sub> in the cold season (Table 2).

Table 3 shows the percentage increases in daily IS counts and daily IS deaths  
with each IQR increment in air pollutant levels in the two-pollutant models. For daily  
IS counts, the estimated effects of NO<sub>2</sub> and SO<sub>2</sub> were more serious when adjusted for  
PM<sub>2.5</sub> and PM<sub>10</sub>. For daily IS deaths, statistical significance was identified for SO<sub>2</sub>  
when adjusted for CO.

## DISCUSSION

1  
2  
3  
4 In this population-based time-series study, a total of 32,840 IS cases and 4,028 IS  
5  
6 death were identified in Changzhou from 2015 to 2016. A significant association of  
7  
8 NO<sub>2</sub> with daily IS counts was observed even when adjusted by PM<sub>2.5</sub> and PM<sub>10</sub>. The  
9  
10 estimated IS risk of NO<sub>2</sub> was more robust in the elderly and in the cold season. In  
11  
12 addition, PM<sub>10</sub>, SO<sub>2</sub> and NO<sub>2</sub> were positively associated with daily IS deaths. Young  
13  
14 individuals had a higher IS mortality risk for PM<sub>2.5</sub>, PM<sub>10</sub>, NO<sub>2</sub> and CO. In addition,  
15  
16 the IS mortality risk of SO<sub>2</sub> was more robust in the elderly, females and cold season;  
17  
18 statistical significance was also identified for SO<sub>2</sub> when adjusted for CO. To the best  
19  
20 of our knowledge, in China, this is the first comprehensive study to explore the acute  
21  
22 effect of air pollutants on the morbidity and mortality of stroke concurrently.  
23  
24  
25  
26  
27

28 PM<sub>10</sub> can cause endothelial dysfunction, inflammatory response and  
29  
30 neuro-functional impairment and, subsequently, induce ischaemia-like injuries in the  
31  
32 brain [26]. In the current study, an IQR increment in PM<sub>10</sub> concentrations was  
33  
34 associated with a 0.268% increment in daily IS deaths, which was consistent with  
35  
36 previous investigations [27, 28]. Moreover, the function curve for PM<sub>10</sub>/ daily IS  
37  
38 deaths was flat at <150 µg/m<sup>3</sup> and became dramatically sharp at high levels. A  
39  
40 previous multicity time-series study indicated an acute, deleterious and significant  
41  
42 effect of PM<sub>10</sub> on IS mortality, and the estimated rate ratios were 1.016 [29].  
43  
44  
45  
46

47 Long-term exposure to PM<sub>10</sub> was positively associated with IS-related death and the  
48  
49 estimated relative risk was 1.37 [30]. Moreover, in this study, a greater estimated IS  
50  
51 mortality risk was observed among males and young individuals. It is plausible that  
52  
53 males and young people spent more time outdoors and were exposed to higher levels  
54  
55  
56  
57

1  
2  
3 of PM<sub>10</sub> than females and the elderly [31].  
4

5  
6 NO<sub>2</sub>, a representative pollutant of vehicle exhaust, has been found to induce  
7  
8 excitotoxicity and endothelial and inflammatory responses and to damage synaptic  
9  
10 plasticity in the brain [32-34]. In China, a multicity case-crossover study  
11  
12 demonstrated that an IQR increase (25.4 µg/m<sup>3</sup>) in NO<sub>2</sub> corresponded to a 2.6%  
13  
14 increment in IS emissions. Stroke mortality was also positively associated with  
15  
16 ambient NO<sub>2</sub> levels [35]. In the present study, we indicated that IQR increments in  
17  
18 NO<sub>2</sub> (12 µg/m<sup>3</sup>) were associated with 0.208% and 0.263% increases in daily IS counts  
19  
20 and IS deaths, respectively. An approximately linear concentration-response  
21  
22 relationship was identified for NO<sub>2</sub> and daily IS counts or daily IS deaths, which was  
23  
24 consistent with the previous studies [36, 37]. The positive association for NO<sub>2</sub> and  
25  
26 daily IS counts could be observed even below the National Ambient Air Quality  
27  
28 Standards of China (80 µg/m<sup>3</sup>). For daily IS counts, the effects of NO<sub>2</sub> were  
29  
30 statistically positive and stronger when adjusted for other pollutants, except for SO<sub>2</sub>  
31  
32 (no statistical association was detected, but a stronger association was observed),  
33  
34 suggesting that the adverse effect of NO<sub>2</sub> on IS onset was stable and that NO<sub>2</sub>  
35  
36 contributed most to the increased risk of IS. Moreover, the effects of NO<sub>2</sub> were more  
37  
38 serious in the cold season and in males. For IS deaths, young females were found to  
39  
40 experience higher risk. An underlying reason may be that the exposure levels of NO<sub>2</sub>  
41  
42 were much higher at these conditions, which was similar to that of PM<sub>10</sub>. The risk  
43  
44 factors for stroke, such as hypertension, atrial fibrillation and diabetes mellitus are  
45  
46 more frequent, and the estimated effects are stronger among females [38]. Females are  
47  
48  
49  
50  
51  
52  
53  
54  
55  
56  
57  
58  
59  
60



1  
2  
3 considered to be more sensitive to stroke onset and deaths. Thus, our findings  
4  
5 regarding the higher risk of IS deaths observed among females were reasonable.  
6  
7

8         SO<sub>2</sub> was considered a strong ambient, gaseous pollutant and irritant that could  
9  
10 elevate the expression of vasoregulatory pathways and proinflammatory enzymes  
11  
12 such as ET-1, iNOS, COX-2, ICAM-1 and TNF- $\alpha$  [39]. In addition, exposure to it was  
13  
14 demonstrated to contribute to the development and progression of IS [18]. In the  
15  
16 present study, SO<sub>2</sub> was significantly associated with daily IS counts when adjusted by  
17  
18 PM<sub>2.5</sub> or PM<sub>10</sub>. In addition, exposure to SO<sub>2</sub> also had statistical associations with daily  
19  
20 IS deaths (the percentage increase was 0.34%), which agreed with previous studies  
21  
22 [19, 40]. The function curve for SO<sub>2</sub> and daily IS deaths was flat at <35  $\mu\text{g}/\text{m}^3$  and  
23  
24 became dramatically sharp at high levels, suggesting that acute and robust increments  
25  
26 of SO<sub>2</sub> might exacerbate IS deaths. Furthermore, the associations were more  
27  
28 pronounced among females, suggesting that females are more susceptible to  
29  
30 IS-related deaths when exposed to gaseous pollutants (NO<sub>2</sub> and SO<sub>2</sub>). In addition, SO<sub>2</sub>  
31  
32 exhibited a higher risk of IS deaths in the elderly [41]. Thus, it can be deduced that  
33  
34 the elderly are more likely to have pre-existing respiratory or cardiovascular burdens,  
35  
36 and these vulnerable conditions could influence the effect of SO<sub>2</sub> on stroke [42]. We  
37  
38 also found that exposure to SO<sub>2</sub> had more serious effects on both IS onset and deaths  
39  
40 in the cold season than in the warm season.  
41  
42  
43  
44  
45  
46  
47  
48  
49

50         Examining the deleterious effect of air pollutants on the incidence and outcomes  
51  
52 of stroke is of significance, and previous studies mainly have focused on one aspect of  
53  
54 IS in China. This study is one of the first to comprehensively explore the relationship  
55  
56

1  
2  
3  
4 between air pollutant levels and morbidity or mortality of IS. As numerous individuals  
5  
6 were included to explore the associations, the results of this work strongly support the  
7  
8 conclusion and may help provide insights into the relationship between air pollutants  
9  
10 and IS. Furthermore, due to the severe air pollution and enormous stroke burden that  
11  
12 Changzhou is now experiencing, the findings of this study may provide clues for the  
13  
14 primary prevention of the onset or death related to IS, especially for sensitive  
15  
16 populations. However, limitations should be noted in this study. Because individuals  
17  
18 were identified retrospectively and not all hospitals were included, diagnostic errors  
19  
20 and selection bias may exist. We relied on routine measurements from ten fixed-site  
21  
22 monitoring stations instead of more accurate measurement based on the individuals'  
23  
24 residence and indoor exposure. Thus, we were not able to quantify the exposure of  
25  
26 individuals precisely. Moreover, the data regarding IS cases and air pollutant levels  
27  
28 were collected from only one city, and it is difficult to extrapolate the results to other  
29  
30 areas in China. Further national or multi-cities studies are required.  
31  
32  
33  
34  
35  
36

37  
38 In conclusion, our results suggested that short-term exposure to ambient NO<sub>2</sub> was  
39  
40 associated with increased IS risk. In addition, SO<sub>2</sub> was associated with increased IS  
41  
42 counts and deaths. These findings may have significant public health implications for  
43  
44 the prevention of IS and IS-related death. Further studies are recommended to validate  
45  
46 our research.  
47  
48  
49  
50  
51

52 **Acknowledgements** The authors are grateful to the PPI group chaired by HD, who  
53  
54 supported the wider programme of work of which the qualitative interviews are a part.  
55  
56

1  
2  
3 The authors are also grateful to the patient representative and to other members of the  
4 study advisory group.  
5  
6

7  
8 **Contributors** The study was conceived and designed by HD, YL and ZZ, and overall  
9 study management was by XY, S-LW and ZZ, ZC, GL and YYao contributed to data  
10 collection and processing. SY performed the statistical analysis, HD, YYu and YL  
11 helped in manuscript preparation and interpretation of the results. All authors  
12 contributed to the revision of the manuscript and reviewed and approved the final  
13 version.  
14  
15

16  
17  
18 **Funding** This work was supported by the Natural Science Foundation of China  
19 (81502801), a project funded by the Priority Academic Program Development of  
20 Jiangsu Higher Education Institutions (2014), a collegiate Natural Science  
21 Foundations of Jiangsu province (16KJB330005), the science and technology support  
22 programme funded by Changzhou Municipal Science and Technology Bureau  
23 (CE20145046) and the Science and Technique Foundation for Youths by Health and  
24 Family Planning Commission of Changzhou (QN201603).  
25  
26  
27  
28  
29  
30  
31  
32  
33  
34  
35  
36  
37  
38  
39

40 **Disclaimer** The funding sponsors had no role in the design of the study, in the  
41 collection, analysis or interpretation of data, in the writing of the manuscript or in the  
42 decision to publish the research results.  
43  
44  
45

46  
47 **Ethical approval** The present study was approved by the Institutional Review Board  
48 of the Changzhou Center for Disease Control and Prevention, and all procedures were  
49 in accordance with prevailing ethical principles.  
50  
51  
52  
53

54 **Competing interests** None declared.  
55  
56

1  
2  
3 **Patient consent** Not needed.  
4

5  
6 **Provenance and peer review** Not commissioned; externally peer reviewed.  
7

8 **Data sharing statement** No additional data are available.  
9

10  
11  
12  
13 **REFERENCES**  
14

15  
16 1 World Health Organization. 7 million premature deaths annually linked to air  
17 pollution. *Air Quality & Climate Change* 2014.  
18  
19

20 <http://www.who.int/mediacentre/news/releases/2014/air-pollution/en/>.  
21  
22

23 2 Vijayan VK, Paramesh H, Salvi SS, *et al*. Enhancing indoor air quality -The air  
24 filter advantage. *Lung India* 2015;**32**:473-9.  
25  
26

27  
28 3 Radwan M, Jurewicz J, Polanska K, *et al*. Exposure to ambient air  
29 pollution--does it affect semen quality and the level of reproductive hormones? *Ann*  
30 *Hum Biol* 2016;**43**:50-6.  
31  
32  
33

34  
35 4 Mills NL, Donaldson K, Hadoke PW, *et al*. Adverse cardiovascular effects of air  
36 pollution. *Nat Clin Pract Card* 2009;**6**:36-44.  
37  
38

39  
40 5 Bayram H, Dikensoy O. Effects of air pollution on respiratory health. *Int J*  
41 *Mycobacteriol* 2015;**4**:59.  
42  
43  
44

45 6 Raza A, Bellander T, Bero-Bedada G, *et al*. Short-term effects of air pollution on  
46 out-of-hospital cardiac arrest in Stockholm. *Eur Heart J* 2014;**35**:861-8.  
47  
48

49  
50 7 Shah AS, Langrish JP, Nair H, *et al*. Global association of air pollution and heart  
51 failure: a systematic review and meta-analysis. *Lancet* 2013;**382**:1039-48.  
52  
53

54  
55 8 Hoek G, Krishnan RM, Beelen R, *et al*. Long-term air pollution exposure and  
56  
57

- 1  
2  
3 cardio- respiratory mortality: a review. *Environmental health* 2013;**12**:43.  
4  
5  
6 9 Atkinson RW, Kang S, Anderson HR, *et al.* Epidemiological time series studies of  
7  
8 PM<sub>2.5</sub> and daily mortality and hospital admissions: a systematic review and  
9  
10 meta-analysis. *Thorax* 2014;**69**:660-5.  
11  
12  
13 10 World Health Organization. Cerebrovascular Disorders: A Clinical and Research  
14  
15 Classification. 1978. ISBN 10: 9241700432 ISBN 13: 9789241700436.  
16  
17  
18 11 Guiraud V, Amor MB, Mas JL, *et al.* Triggers of ischemic stroke: a systematic  
19  
20 review. *Stroke* 2010;**41**:2669-77.  
21  
22  
23 12 Ohira T, Shahar E, Chambless LE, *et al.* Risk factors for ischemic stroke subtypes:  
24  
25 the Atherosclerosis Risk in Communities study. *Stroke* 2006;**37**:2493-8.  
26  
27  
28 13 Lozano R, Naghavi M, Foreman K, *et al.* Global and regional mortality from 235  
29  
30 causes of death for 20 age groups in 1990 and 2010: a systematic analysis for the  
31  
32 Global Burden of Disease Study 2010. *Lancet* 2013;**380**:2095-128  
33  
34  
35 14 Murray CJ, Vos T, Lozano R, *et al.* Disability-adjusted life years (DALYs) for  
36  
37 291 diseases and injuries in 21 regions, 1990-2010: a systematic analysis for the  
38  
39 Global Burden of Disease Study 2010. *Lancet* 2012;**380**:2197-223.  
40  
41  
42 15 Wang WZ, Jiang B, Sun HX, *et al.* Prevalence, Incidence, and Mortality of Stroke  
43  
44 in China Results from a Nationwide Population-Based Survey of 480 687 Adults.  
45  
46 *Circulation* 2017;**135**:759-71.  
47  
48  
49 16 Liu LP, Wang D, Wong KSL, *et al.* Stroke and Stroke Care in China Huge Burden,  
50  
51 Significant Workload, and a National Priority. *Stroke* 2011;**42**:3651-4.  
52  
53  
54 17 Straus SE, Majumdar SR, McAlister FA. New evidence for stroke prevention -  
55  
56  
57  
58  
59  
60

1  
2  
3 Scientific review. *JAMA* 2002;**288**:1388-95.

4  
5  
6 18 Chung JW, Bang OY, Ahn K, *et al.* Air Pollution Is Associated With Ischemic  
7  
8 Stroke via Cardiogenic Embolism. *Stroke* 2017;**48**:17-23.

9  
10  
11 19 Yang WS, Wang X, Deng Q, *et al.* An evidence-based appraisal of global  
12  
13 association between air pollution and risk of stroke. *Int J Cardiol* 2014;**175**:307-13.

14  
15  
16 20 Kerstens SM, de Mes TZD, Lue B. Designing sustainable sanitation in urban  
17  
18 planning proposed for Changzhou, China. *Water Sci Technol* 2009;**60**:3165-72.

19  
20  
21 21 Li L, Chen CH, Huang C, *et al.* [Regional air pollution characteristics simulation  
22  
23 of O<sub>3</sub> and PM<sub>10</sub> over Yangtze River Delta region]. *Huan Jing Ke Xue*  
24  
25 2008;**29**:237-45.

26  
27  
28 22 Liao Z, Gao M, Sun J, *et al.* The impact of synoptic circulation on air quality and  
29  
30 pollution-related human health in the Yangtze River Delta region. *Sci Total Environ*  
31  
32 2017;**607-608**:838-46.

33  
34  
35 23 Dockery DW, Luttmann-Gibson H, Rich DQ, *et al.* Association of air pollution  
36  
37 with increased incidence of ventricular tachyarrhythmias recorded by implanted  
38  
39 cardioverter defibrillators. *Environ Health Perspect* 2005;**113**:670-4.

40  
41  
42 24 Wellenius GA, Burger MR, Coull BA, *et al.* Ambient air pollution and the risk of  
43  
44 acute ischemic stroke. *Archives of internal medicine* 2012;**172**:229-34.

45  
46  
47 25 Xie W, Li G, Zhao D, *et al.* Relationship between fine particulate air pollution  
48  
49 and ischaemic heart disease morbidity and mortality. *Heart* 2015;**101**:257-63.

50  
51  
52 26 Guo L, Li B, Miao JJ, *et al.* Seasonal variation in air particulate matter (PM<sub>10</sub>)  
53  
54 exposure-induced ischemia-like injuries in the rat brain. *Chem Res Toxicol*

1  
2  
3  
4  
5  
6  
7  
8  
9  
10  
11  
12  
13  
14  
15  
16  
17  
18  
19  
20  
21  
22  
23  
24  
25  
26  
27  
28  
29  
30  
31  
32  
33  
34  
35  
36  
37  
38  
39  
40  
41  
42  
43  
44  
45  
46  
47  
48  
49  
50  
51  
52  
53  
54  
55  
56  
57  
58  
59  
60

2015;**28**:431-9.

27 Kettunen J, Lanki T, Tiittanen P, *et al.* Associations of fine and ultrafine particulate air pollution with stroke mortality in an area of low air pollution levels. *Stroke* 2007;**38**:918-22.

28 Wang Y, Eliot MN, Wellenius GA. Short-term changes in ambient particulate matter and risk of stroke: a systematic review and meta-analysis. *J Am Heart Assoc* 2014;**3**:845-7.

29 Yorifuji T, Kashima S. Associations of particulate matter with stroke mortality: a multicity study in Japan. *J Occup Environ Med* 2013;**55**:768-71.

30 Hart JE, Puett RC, Rexrode KM, *et al.* Effect Modification of Long - Term Air Pollution Exposures and the Risk of Incident Cardiovascular Disease in US Women. *J Am Heart Assoc* 2015;**4**:e002301.

31 Qiu H, Yu IT, Wang X, *et al.* Cool and dry weather enhances the effects of air pollution on emergency IHD hospital admissions. *Int J Cardiol* 2013;**168**:500-5.

32 Zhu N, Li H, Han M, *et al.* Environmental nitrogen dioxide (NO<sub>2</sub>) exposure influences development and progression of ischemic stroke. *Toxicol lett* 2012;**214**:120-30.

33 Andersen ZJ, Kristiansen LC, Andersen KK, *et al.* Stroke and long-term exposure to outdoor air pollution from nitrogen dioxide: a cohort study. *Stroke* 2012;**43**:320-5.

34 Dijkema MB, van Strien RT, van der Zee SC, *et al.* Spatial variation in nitrogen dioxide concentrations and cardiopulmonary hospital admissions. *Environ Res* 2016;**151**:721-27.

1  
2  
3 35 Liu H, Tian Y, Xu Y, *et al.* Association between ambient air pollution and  
4 hospitalization for ischemic and hemorrhagic stroke in China: A multicity  
5 case-crossover study. *Environ Pollut* 2017;**230**:234-41.  
6  
7

8  
9  
10 36 Chen R, Zhang Y, Yang C, *et al.* Acute effect of ambient air pollution on stroke  
11 mortality in the China air pollution and health effects study. *Stroke* 2013;**44**:954-60.  
12  
13

14 37 Qian Y, Zhu M, Cai B, *et al.* Epidemiological evidence on association between  
15 ambient air pollution and stroke mortality. *J Epidemiol Community Health*  
16 2013;**67**:635-40.  
17  
18

19 38 Cordonnier C, Sprigg N, Sandset EC, *et al.* Stroke in women - from evidence to  
20 inequalities. *Neurology* 2017;**13**:521-32.  
21  
22

23 39 Sang N, Yun Y, Li H, *et al.* SO<sub>2</sub> inhalation contributes to the development and  
24 progression of ischemic stroke in the brain. *Toxicol Sci* 2010;**114**:226-36.  
25  
26

27 40 Shah AS, Lee KK, McAllister DA, *et al.* Short term exposure to air pollution and  
28 stroke: systematic review and meta-analysis. *Bmj* 2015;**350**:h1295.  
29  
30

31 41 Huang F, Luo Y, Peng T, *et al.* Gaseous Air Pollution and the Risk for Stroke  
32 Admissions: A Case-Crossover Study in Beijing, China. *Int J Environ Res Public*  
33 *Health* 2017;**14**:189.  
34  
35

36 42 Zanobetti A, Schwartz J, Gold D. Are there sensitive subgroups for the effects of  
37 airborne particles? *Environ Health Persp* 2000;**108**:841-5.  
38  
39  
40  
41  
42  
43  
44



### Figure legends

**Figure 1** The percentage change in daily ischaemic stroke (IS) counts and daily IS deaths with an interquartile range increase in air pollutant levels on different lag days in single-pollutant models in Changzhou, 2015-2016. The data are expressed as the mean with a 95% confidence interval.

**Figure 2** The concentration-response relationships of daily ischaemic stroke (IS) counts, daily IS deaths with air pollutants on different lag days (lag 0-5 for daily IS counts and lag 5 for daily IS deaths) in single-pollutant models in Changzhou, 2015-2016.

**Table 1** The means, medians and interquartile ranges (IQRs) for daily air pollutants and weather conditions variables in Changzhou, 2015-2016

| Variables                              | Mean±SD   | Min  | 25th | Median | 75th  | Max   | IQR  |
|----------------------------------------|-----------|------|------|--------|-------|-------|------|
| <b>Weather Condition</b>               |           |      |      |        |       |       |      |
| Temperature (°C)                       | 17.1±8.9  | -6.6 | 9.4  | 18.3   | 24.1  | 34.6  | 5.8  |
| Humidity (%)                           | 75.3±14.2 | 35.0 | 66.0 | 76.0   | 86.0  | 100.0 | 10.0 |
| <b>Air Pollutions</b>                  |           |      |      |        |       |       |      |
| PM <sub>2.5</sub> (µg/m <sup>3</sup> ) | 51.8±30.6 | 6.8  | 29.4 | 44.4   | 64.4  | 181.1 | 20.0 |
| PM <sub>10</sub> (µg/m <sup>3</sup> )  | 85.3±43.3 | 10.5 | 51.5 | 76.6   | 108.6 | 289.1 | 32.0 |
| NO <sub>2</sub> (µg/m <sup>3</sup> )   | 38.7±16   | 10.9 | 26.5 | 35.8   | 47.8  | 117.3 | 12.0 |
| SO <sub>2</sub> (µg/m <sup>3</sup> )   | 22.3±10   | 6.9  | 14.7 | 20.2   | 27.0  | 67.8  | 6.9  |
| CO (mg/m <sup>3</sup> )                | 1±0.3     | 0.4  | 0.8  | 1.0    | 1.2   | 2.6   | 0.2  |

PM<sub>2.5</sub>, particulate matter <2.5 mm in diameter; PM<sub>10</sub>, particulate matter <10 mm in diameter; NO<sub>2</sub>, nitrogen dioxide; SO<sub>2</sub>, sulfur dioxide; CO, carbon monoxide.

**Table 2** The percentage change in daily IS counts and deaths with an interquartile range increase in air pollutants levels modifying by age, sex and seasons in Changzhou, 2015-2016

| Variable                | Total                    | Age                      |                          | Sex                      |                          | Seasons                  |                          |
|-------------------------|--------------------------|--------------------------|--------------------------|--------------------------|--------------------------|--------------------------|--------------------------|
|                         |                          | ≤65                      | >65                      | Female                   | Male                     | Warm                     | Cold                     |
| <b>Daily IS counts*</b> |                          |                          |                          |                          |                          |                          |                          |
| PM <sub>2.5</sub>       | -0.063<br>(-0.215-0.088) | -0.246<br>(-0.568-0.076) | -0.042<br>(-0.21-0.127)  | -0.097<br>(-0.311-0.119) | -0.08<br>(-0.289-0.128)  | -0.149<br>(-0.525-0.228) | -0.098<br>(-0.267-0.071) |
| PM <sub>10</sub>        | -0.053<br>(-0.22-0.114)  | -0.219<br>(-0.572-0.136) | -0.004<br>(-0.191-0.184) | -0.086<br>(-0.324-0.153) | -0.047<br>(-0.279-0.185) | -0.057<br>(-0.41-0.297)  | -0.088<br>(-0.282-0.107) |
| NO <sub>2</sub>         | 0.208<br>(0.036-0.381)‡  | 0.258<br>(-0.075-0.592)  | 0.166<br>(-0.025-0.357)  | 0.168<br>(-0.055-0.391)  | 0.238<br>(0.002-0.475)‡  | -0.136<br>(-0.481-0.21)  | 0.382<br>(0.169-0.596)‡  |
| SO <sub>2</sub>         | 0.125<br>(-0.034-0.284)  | -0.044<br>(-0.364-0.277) | 0.113<br>(-0.062-0.289)  | 0.15<br>(-0.068-0.369)   | 0.056<br>(-0.162-0.275)  | -0.309<br>(-0.651-0.033) | 0.298<br>(0.099-0.498)‡  |
| CO                      | -0.078<br>(-0.22-0.064)  | -0.213<br>(-0.511-0.086) | -0.061<br>(-0.222-0.1)   | -0.151<br>(-0.355-0.053) | -0.007<br>(-0.206-0.192) | -0.175<br>(-0.432-0.083) | -0.053<br>(-0.237-0.131) |
| <b>Daily IS deaths†</b> |                          |                          |                          |                          |                          |                          |                          |
| PM <sub>2.5</sub>       | 0.228<br>(-0.005-0.462)  | 1.144<br>(0.329-1.965)‡  | 0.152<br>(-0.091-0.395)  | 0.124<br>(-0.19-0.439)   | 0.29<br>(-0.043-0.625)   | -0.199<br>(-0.77-0.375)  | 0.184<br>(-0.088-0.456)  |
| PM <sub>10</sub>        | 0.268<br>(0.007-0.528)‡  | 1.52<br>(0.656-2.391)‡   | 0.152<br>(-0.12-0.424)   | 0.093<br>(-0.261-0.448)  | 0.404<br>(0.03-0.78)‡    | -0.012<br>(-0.53-0.509)  | 0.247<br>(-0.075-0.57)   |
| NO <sub>2</sub>         | 0.263<br>(0.004-0.522)‡  | 0.894<br>(0.058-1.736)‡  | 0.195<br>(-0.073-0.463)  | 0.37<br>(0.027-0.715)‡   | 0.132<br>(-0.247-0.512)  | 0.275<br>(-0.222-0.775)  | 0.198<br>(-0.13-0.528)   |
| SO <sub>2</sub>         | 0.34<br>(0.088-0.592)‡   | 0.67<br>(-0.175-1.523)   | 0.307<br>(0.045-0.57)‡   | 0.434<br>(0.096-0.772)‡  | 0.215<br>(-0.15-0.58)    | 0.017<br>(-0.493-0.531)  | 0.388<br>(0.081-0.696)‡  |
| CO                      | 0.175<br>(-0.042-0.392)  | 0.9<br>(0.166-1.639)‡    | 0.108<br>(-0.118-0.335)  | 0.189<br>(-0.11-0.49)    | 0.154<br>(-0.162-0.471)  | 0.02<br>(-0.401-0.443)   | 0.169<br>(-0.104-0.443)  |

\*The multivariable regression model fits the pollutants for daily IS count data at lag 0-5 and adjusts for calendar time (df=5), DOW (df=7), daily average humidity (df=5) and average temperature (df=5).

†The multivariable regression model fits the pollutants for daily IS death data at lag 5 and adjusts for calendar time (df=5), DOW (df=7), daily average humidity (df=5) and average temperature (df=5).

1  
2  
3  
4  
5  
6  
7  
8  
9  
10  
11  
12  
13  
14  
15  
16  
17  
18  
19  
20  
21  
22  
23  
24  
25  
26  
27  
28  
29  
30  
31  
32  
33  
34  
35  
36  
37  
38  
39  
40  
41  
42  
43  
44  
45  
46  
47  
48  
49  
50  
51  
52  
53  
54  
55  
56  
57  
58  
59  
60

‡ Statistically positive association between air pollutants and daily IS counts or deaths

The data are expressed as the mean with a 95% confidence interval.

For peer review only

**Table 3** The percent increases in daily IS counts and deaths with each interquartile range increment in air pollutant levels in two-pollutant models in Changzhou, 2015-2016

| Variables         | PM <sub>2.5</sub>         | PM <sub>10</sub>          | NO <sub>2</sub>         | SO <sub>2</sub>          | CO                        |
|-------------------|---------------------------|---------------------------|-------------------------|--------------------------|---------------------------|
| Daily IS counts   |                           |                           |                         |                          |                           |
| PM <sub>2.5</sub> | -0.063<br>(-0.215-0.088)  | 0.25<br>(-0.314-0.817)    | 0.497<br>(0.259-0.735)‡ | 0.305<br>(0.083-0.527) ‡ | -0.059<br>(-0.274-0.157)  |
| PM <sub>10</sub>  | -0.423<br>(-0.881-0.038)  | -0.053<br>(-0.22-0.114)   | 0.539<br>(0.29-0.788)‡  | 0.262<br>(0.034-0.491) ‡ | -0.065<br>(-0.293-0.163)  |
| NO <sub>2</sub>   | -0.346<br>(-0.558--0.134) | -0.438<br>(-0.691--0.185) | 0.208<br>(0.036-0.381)‡ | -0.007<br>(-0.267-0.253) | -0.341<br>(-0.556--0.124) |
| SO <sub>2</sub>   | -0.24<br>(-0.46--0.019)   | -0.244<br>(-0.49-0.003)   | 0.22<br>(-0.067-0.507)  | 0.125<br>(-0.034-0.284)  | -0.166<br>(-0.356-0.023)  |
| CO                | -0.089<br>(-0.314-0.137)  | 0.029<br>(-0.223-0.281)   | 0.45<br>(0.215-0.685)‡  | 0.172<br>(-0.016-0.361)  | -0.078<br>(-0.22-0.064)   |
| Daily IS deaths   |                           |                           |                         |                          |                           |
| PM <sub>2.5</sub> | 0.228<br>(-0.005-0.462)   | 0.436<br>(-0.36-1.238)    | 0.22<br>(-0.127-0.567)  | 0.28<br>(-0.071-0.632)   | 0.065<br>(-0.314-0.446)   |
| PM <sub>10</sub>  | 0.211<br>(-0.463-0.89)    | 0.268<br>(0.007-0.528)‡   | 0.218<br>(-0.135-0.573) | 0.295<br>(-0.055-0.646)  | 0.137<br>(-0.23-0.504)    |
| NO <sub>2</sub>   | 0.106<br>(-0.201-0.414)   | 0.149<br>(-0.21-0.509)    | 0.263<br>(0.004-0.522)‡ | 0.351<br>(-0.096-0.8)    | 0.057<br>(-0.269-0.384)   |
| SO <sub>2</sub>   | 0.066<br>(-0.25-0.383)    | 0.126<br>(-0.242-0.496)   | 0.066<br>(-0.387-0.521) | 0.34<br>(0.088-0.592)‡   | 0.035<br>(-0.281-0.351)   |
| CO                | 0.186<br>(-0.199-0.571)   | 0.233<br>(-0.187-0.656)   | 0.23<br>(-0.14-0.601)   | 0.346<br>(0.002-0.691)‡  | 0.175<br>(-0.042-0.392)   |

\*The multivariable regression model fits the pollutants for daily IS counts data at lag 0-5 and

adjusts for the other pollutants, calendar time (df=5), DOW (df=7), daily average humidity (df=5)

and average temperature (df=5).

†The multivariable regression model fits the pollutants for daily IS deaths data at lag 5 and adjusts

for the other pollutants, calendar time (df=5), DOW (df=7), daily average humidity (df=5) and

average temperature (df=5).

1  
2  
3  
4  
5  
6  
7  
8  
9  
10  
11  
12  
13  
14  
15  
16  
17  
18  
19  
20  
21  
22  
23  
24  
25  
26  
27  
28  
29  
30  
31  
32  
33  
34  
35  
36  
37  
38  
39  
40  
41  
42  
43  
44  
45  
46  
47  
48  
49  
50  
51  
52  
53  
54  
55  
56  
57  
58  
59  
60

‡ Statistically positive association between air pollutants and daily IS counts or deaths

The data was expressed as the mean with 95% confidence interval.

For peer review only

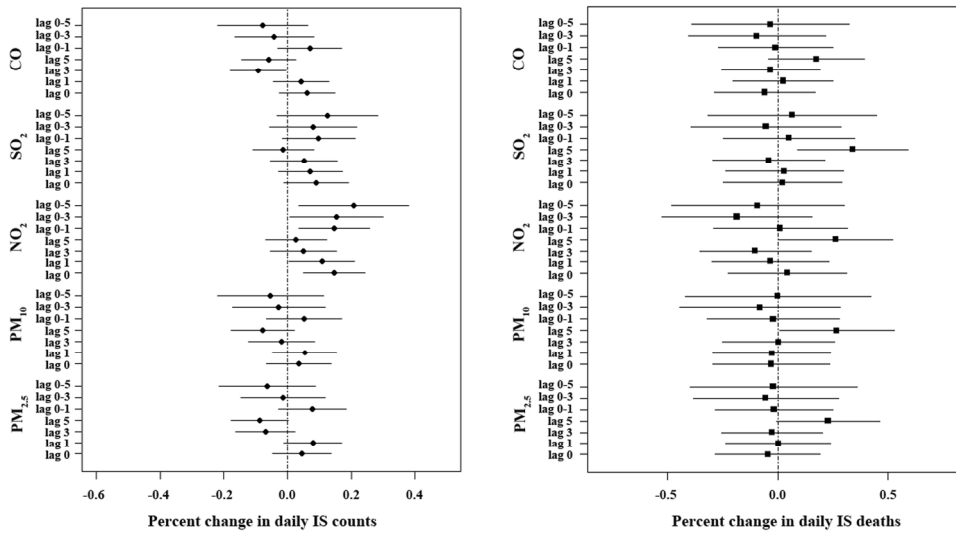

Figure 1 The percentage change in daily ischemic stroke (IS) counts and daily IS deaths with an interquartile range increase in air pollutants levels on different lag days in single-pollutant models in Changzhou, 2015-2016. The data was expressed as mean with 95% confidence interval.

86x48mm (600 x 600 DPI)



Figure 2 The concentration-response relationships of daily ischemic stroke (IS) counts, daily IS deaths with air pollutants on different lag days (lag 0-5 for daily IS counts and lag 5 for daily IS deaths) in single-pollutant models in Changzhou, 2015-2016.

107x75mm (600 x 600 DPI)



1  
2  
3  
4 **Acute effects of air pollution on ischemic stroke onsets and deaths: A time-series**  
5  
6 **study in Changzhou, China**  
7  
8  
9

10  
11 Huibin Dong<sup>1, a</sup>, Yongquan Yu<sup>2, a</sup>, Shen Yao<sup>2</sup>, Yan Lu<sup>3</sup>, Zhiyong Chen<sup>1</sup>, Guiying Li<sup>1</sup>,

12  
13  
14 Yao Yao<sup>1</sup>, Xingjuan Yao<sup>1</sup>, Shou-Lin Wang<sup>2</sup>, Zhan Zhang<sup>4\*</sup>  
15  
16

17  
18  
19 **Supplementary data**  
20  
21  
22  
23  
24  
25  
26  
27  
28  
29  
30  
31  
32  
33  
34  
35  
36  
37  
38  
39  
40  
41  
42  
43  
44  
45  
46  
47  
48  
49  
50  
51  
52  
53  
54  
55  
56  
57  
58  
59  
60

**Table S1** The descriptive statistics for daily ischemic stroke (IS) counts and deaths in Changzhou, 2015-2016\*

| Variables       | Mean± SD  | Min  | 25th | Median | 75th | Max  |
|-----------------|-----------|------|------|--------|------|------|
| Daily IS counts | 45.4±11.2 | 14.0 | 38.0 | 45.0   | 53.0 | 99.0 |
| Male            | 23.7±7    | 6.0  | 19.0 | 23.0   | 28.0 | 60.0 |
| Female          | 21.8±6.1  | 6.0  | 18.0 | 22.0   | 26.0 | 48.0 |
| <65             | 8.5±3.6   | 0.0  | 6.0  | 8.0    | 11.0 | 23.0 |
| ≥65             | 36.9±9.2  | 11.0 | 31.0 | 36.0   | 43.0 | 80.0 |
| Daily IS deaths | 5.6±2.9   | 0.0  | 3.0  | 5.0    | 7.0  | 19.0 |
| Male            | 2.7±1.8   | 0.0  | 1.0  | 3.0    | 4.0  | 10.0 |
| Female          | 2.8±2     | 0.0  | 1.0  | 3.0    | 4.0  | 10.0 |
| <65             | 0.4±0.7   | 0.0  | 0.0  | 0.0    | 1.0  | 3.0  |
| ≥65             | 5.1±2.8   | 0.0  | 3.0  | 5.0    | 7.0  | 18.0 |

\*A total of 32,840 IS cases and 4,028 IS deaths recorded were recorded during the study period.

STROBE Statement—Checklist of items that should be included in reports of *cross-sectional studies*

|                              | Item No                | Recommendation                                                                                                                                                                                                                                                                                                                                                                                                |
|------------------------------|------------------------|---------------------------------------------------------------------------------------------------------------------------------------------------------------------------------------------------------------------------------------------------------------------------------------------------------------------------------------------------------------------------------------------------------------|
| <b>Title and abstract</b>    | 1-4                    | Acute effects of air pollution on <del>ischaemic</del> stroke onsets and deaths: A time-series study in Changzhou, China<br>(b) Provide in the abstract an informative and balanced summary of what was done and what was found                                                                                                                                                                               |
| <b>Introduction</b>          |                        |                                                                                                                                                                                                                                                                                                                                                                                                               |
| Background/rationale         | 5-6                    | Explain the scientific background and rationale for the investigation being reported                                                                                                                                                                                                                                                                                                                          |
| Objectives                   | 6                      | State specific objectives, including any prespecified hypotheses                                                                                                                                                                                                                                                                                                                                              |
| <b>Methods</b>               |                        |                                                                                                                                                                                                                                                                                                                                                                                                               |
| Study design                 | 7-9                    | Present key elements of study design early in the paper                                                                                                                                                                                                                                                                                                                                                       |
| Setting                      | 7                      | Describe the setting, locations, and relevant dates, including periods of recruitment, exposure, follow-up, and data collection                                                                                                                                                                                                                                                                               |
| Participants                 | 7                      | (a) Give the eligibility criteria, and the sources and methods of selection of participants                                                                                                                                                                                                                                                                                                                   |
| Variables                    | 7-8                    | Clearly define all outcomes, exposures, predictors, potential confounders, and effect modifiers. Give diagnostic criteria, if applicable                                                                                                                                                                                                                                                                      |
| Data sources/<br>measurement | 7*                     | For each variable of interest, give sources of data and details of methods of assessment (measurement). Describe comparability of assessment methods if there is more than one group                                                                                                                                                                                                                          |
| Bias                         | 7-8                    | Describe any efforts to address potential sources of bias                                                                                                                                                                                                                                                                                                                                                     |
| Study size                   | 7                      | Explain how the study size was arrived at                                                                                                                                                                                                                                                                                                                                                                     |
| Quantitative variables       | 8                      | Explain how quantitative variables were handled in the analyses. If applicable, describe which groupings were chosen and why                                                                                                                                                                                                                                                                                  |
| Statistical methods          | 7-9                    | (a) Describe all statistical methods, including those used to control for confounding<br>(b) Describe any methods used to examine subgroups and interactions<br>(c) Explain how missing data were addressed<br>(d) If applicable, describe analytical methods taking account of sampling strategy<br>(e) Describe any sensitivity analyses                                                                    |
| <b>Results</b>               |                        |                                                                                                                                                                                                                                                                                                                                                                                                               |
| Participants                 | 9-10*                  | (a) Report numbers of individuals at each stage of study—eg numbers potentially eligible, examined for eligibility, confirmed eligible, included in the study, completing follow-up, and analysed<br>(b) Give reasons for non-participation at each stage<br>(c) Consider use of a flow diagram                                                                                                               |
| Descriptive data             | 9-10*                  | (a) Give characteristics of study participants (eg demographic, clinical, social) and information on exposures and potential confounders<br>(b) Indicate number of participants with missing data for each variable of interest                                                                                                                                                                               |
| Outcome data                 | <del>10</del> -<br>11* | Report numbers of outcome events or summary measures                                                                                                                                                                                                                                                                                                                                                          |
| Main results                 | 10-11                  | (a) Give unadjusted estimates and, if applicable, confounder-adjusted estimates and their precision (eg, 95% confidence interval). Make clear which confounders were adjusted for and why they were included<br>(b) Report category boundaries when continuous variables were categorized<br>(c) If relevant, consider translating estimates of relative risk into absolute risk for a meaningful time period |

|                          |                         |                                                                                                                                                                            |
|--------------------------|-------------------------|----------------------------------------------------------------------------------------------------------------------------------------------------------------------------|
| Other analyses           | 10-11                   | Report other analyses done—eg analyses of subgroups and interactions, and sensitivity analyses                                                                             |
| <b>Discussion</b>        |                         |                                                                                                                                                                            |
| Key results              | 11-12                   | Summarise key results with reference to study objectives                                                                                                                   |
| Limitations              | <del>12-</del><br>13-15 | Discuss limitations of the study, taking into account sources of potential bias or imprecision. Discuss both direction and magnitude of any potential bias                 |
| Interpretation           | 12-<br>13-14            | Give a cautious overall interpretation of results considering objectives, limitations, multiplicity of analyses, results from similar studies, and other relevant evidence |
| Generalisability         | 14-15                   | Discuss the generalisability (external validity) of the study results                                                                                                      |
| <b>Other information</b> |                         |                                                                                                                                                                            |
| Funding                  | 164                     | Give the source of funding and the role of the funders for the present study and, if applicable, for the original study on which the present article is based              |

\*Give information separately for exposed and unexposed groups.

**Note:** An Explanation and Elaboration article discusses each checklist item and gives methodological background and published examples of transparent reporting. The STROBE checklist is best used in conjunction with this article (freely available on the Web sites of PLoS Medicine at <http://www.plosmedicine.org/>, Annals of Internal Medicine at <http://www.annals.org/>, and Epidemiology at <http://www.epidem.com/>). Information on the STROBE Initiative is available at [www.strobe-statement.org](http://www.strobe-statement.org).
