# Supplementary material for: Acute effects of air pollution on ischaemic stroke onset and deaths: a time-series study in Changzhou, China
Source: PubMed Central journal article supplement — BMJ Open. 2018 Jul 23;8(7):e020425. doi: 10.1136/bmjopen-2017-020425 (PMC6059268; doi:10.1136/bmjopen-2017-020425), 2018-07-23
Supplement: bmjopen-2017-020425supp001.pdf [file bmjopen-2017-020425supp001.pdf]

**Acute effects of air pollution on ischemic stroke onsets and deaths: A time-series  
study in Changzhou, China**

Huibin Dong<sup>1, a</sup>, Yongquan Yu<sup>2, a</sup>, Shen Yao<sup>2</sup>, Yan Lu<sup>3</sup>, Zhiyong Chen<sup>1</sup>, Guiying Li<sup>1</sup>,  
Yao Yao<sup>1</sup>, Xingjuan Yao<sup>1</sup>, Shou-Lin Wang<sup>2</sup>, Zhan Zhang<sup>4\*</sup>

**Supplementary data**

**Table S1** The descriptive statistics for daily ischemic stroke (IS) counts and deaths in Changzhou, 2015-2016\*

| Variables       | Mean± SD  | Min  | 25th | Median | 75th | Max  |
|-----------------|-----------|------|------|--------|------|------|
| Daily IS counts | 45.4±11.2 | 14.0 | 38.0 | 45.0   | 53.0 | 99.0 |
| Male            | 23.7±7    | 6.0  | 19.0 | 23.0   | 28.0 | 60.0 |
| Female          | 21.8±6.1  | 6.0  | 18.0 | 22.0   | 26.0 | 48.0 |
| <65             | 8.5±3.6   | 0.0  | 6.0  | 8.0    | 11.0 | 23.0 |
| ≥65             | 36.9±9.2  | 11.0 | 31.0 | 36.0   | 43.0 | 80.0 |
| Daily IS deaths | 5.6±2.9   | 0.0  | 3.0  | 5.0    | 7.0  | 19.0 |
| Male            | 2.7±1.8   | 0.0  | 1.0  | 3.0    | 4.0  | 10.0 |
| Female          | 2.8±2     | 0.0  | 1.0  | 3.0    | 4.0  | 10.0 |
| <65             | 0.4±0.7   | 0.0  | 0.0  | 0.0    | 1.0  | 3.0  |
| ≥65             | 5.1±2.8   | 0.0  | 3.0  | 5.0    | 7.0  | 18.0 |

\*A total of 32,840 IS cases and 4,028 IS deaths recorded were recorded during the study period.
